# Supplementary material for: In vitro Edwardsiella piscicida CK108 Transcriptome Profiles with Subinhibitory Concentrations of Phenol and Formalin Reveal New Insights into Bacterial Pathogenesis Mechanisms
Source: MDPI journal article supplement (doi:10.3390/microorganisms8071068), 2020-07-17

Supplementary Fig 1. Determination of the distance between inter- and intragroup. (A) Hierarchical clustering of samples by the Euclidean distances. The distance reflects on the histogram color as indicated as color key. (B) PCA plot.

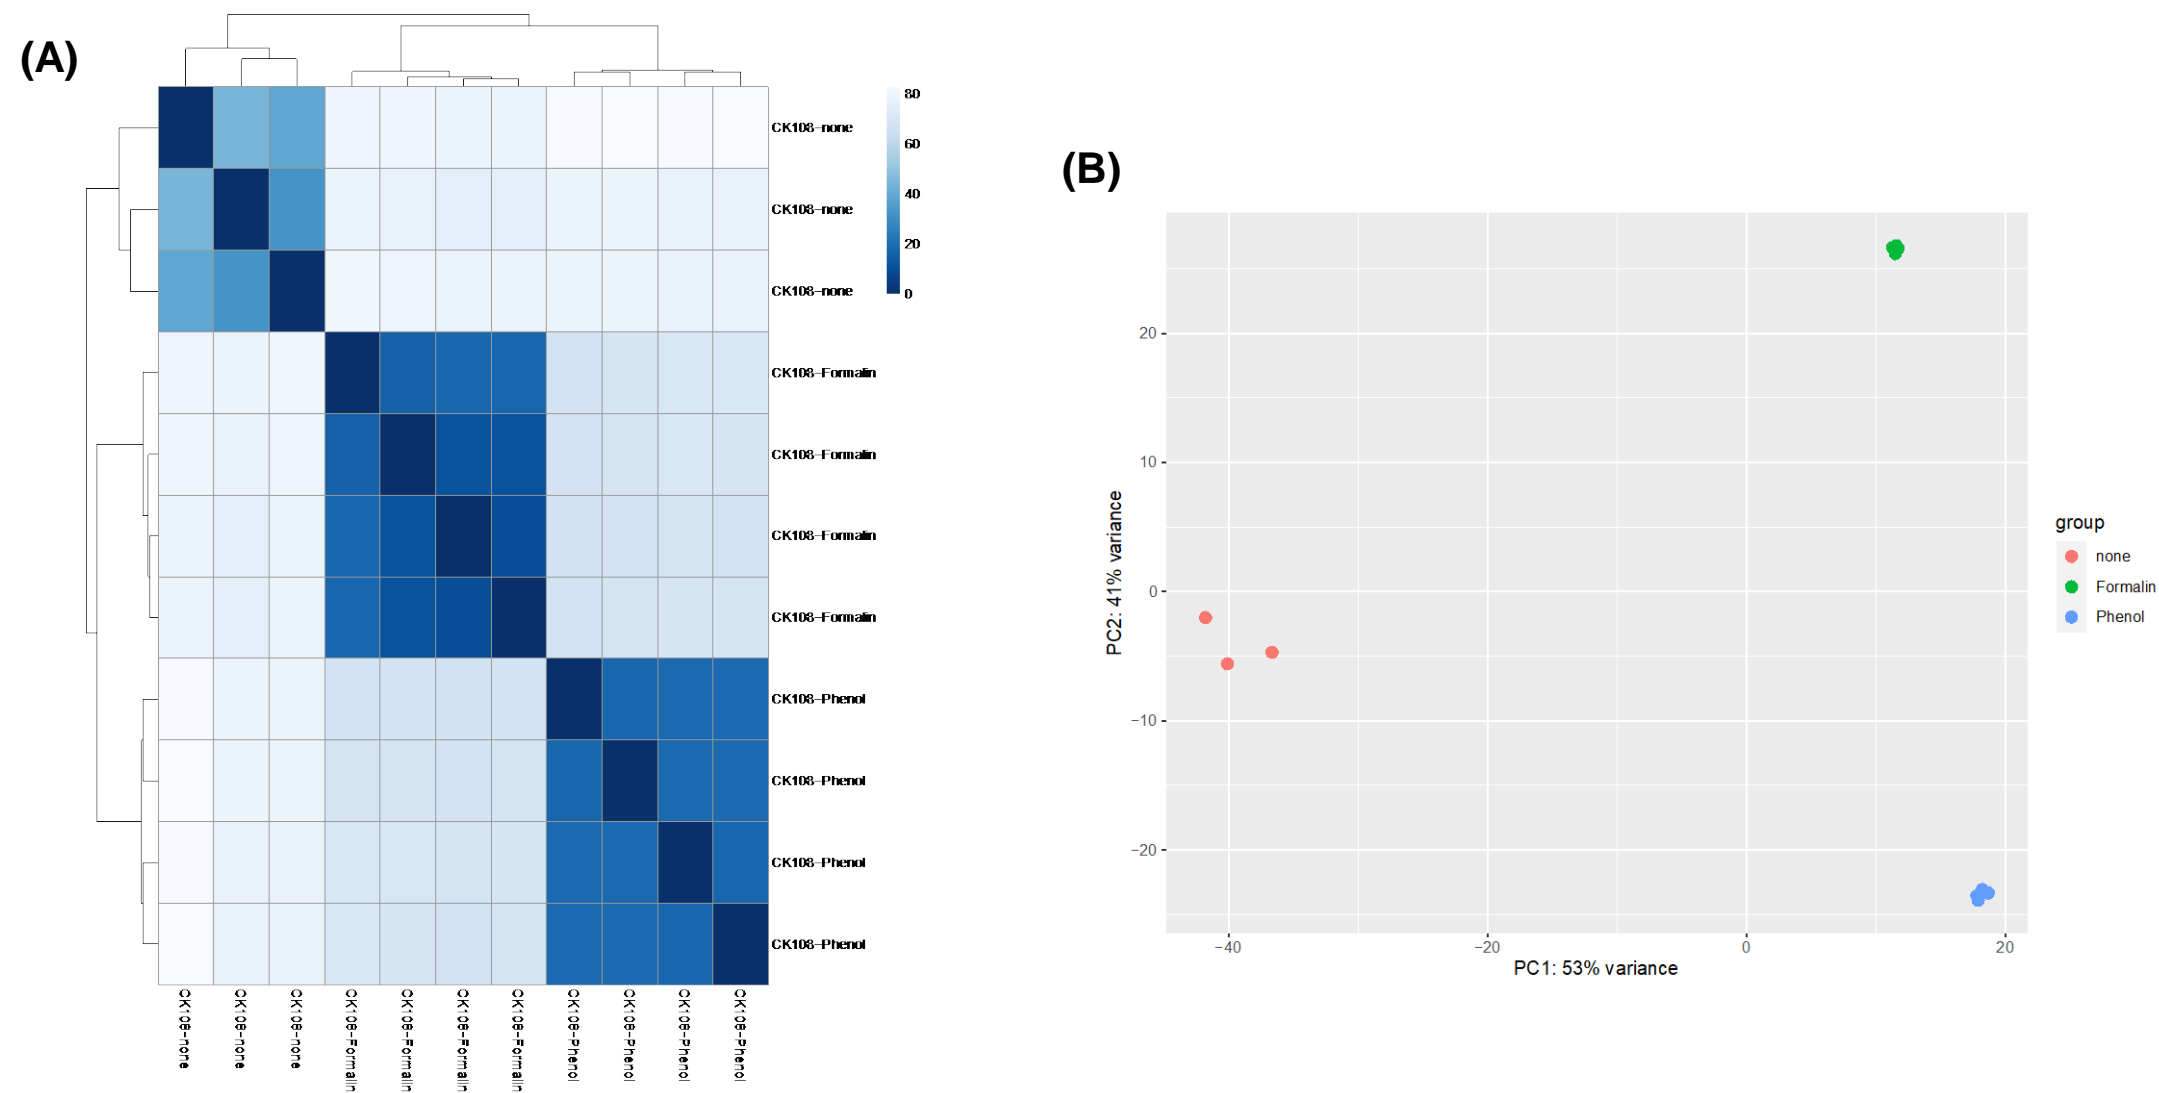

Supplement: s1 [file s1]
