# Supplementary material for: In vitro Edwardsiella piscicida CK108 Transcriptome Profiles with Subinhibitory Concentrations of Phenol and Formalin Reveal New Insights into Bacterial Pathogenesis Mechanisms
Source: Microorganisms. 2020 Jul 17;8(7):1068. doi: 10.3390/microorganisms8071068 (PMC7409036; doi:10.3390/microorganisms8071068)
Supplement: Supplementary file 1 [file microorganisms-08-01068-s001.zip]

Archive with 4 entries (4 files):
- Suppl_Figure.pdf
- Suppl_Table S1_DEGs when phenol treated.xlsx
- Suppl_Table S2_DEGs when formalin treated.xlsx
- Suppl_Table S3_Primers.xlsx
