# Supplementary material for: In vitro Edwardsiella piscicida CK108 Transcriptome Profiles with Subinhibitory Concentrations of Phenol and Formalin Reveal New Insights into Bacterial Pathogenesis Mechanisms
Source: Microorganisms. 2020 Jul 17;8(7):1068. doi: 10.3390/microorganisms8071068 (PMC7409036; doi:10.3390/microorganisms8071068)
Supplement: Supplementary file 1 [file microorganisms-08-01068-s001.zip › Suppl_Table S1_DEGs when phenol treated.xlsx]

## Sheet: Legend
Table S1. DEGs when phenol treated
Column name	Description
Locus	Gene identifier
log2FoldChange	Gene expression level compared to none-treated cells
padj	Adjusting p-values by Benjamini-Hochberg (BH) method
Old_locus	Old gene identifier
Protein_name	Annotation of the function

## Sheet: DEG list
Locus	log2FoldChange	padj	Old_locus	Protein_name
ETAC_RS01450	-8.2867	0	ETAC_01425	amino acid dehydrogenase
ETAC_RS05930	-6.21544	0	ETAC_05885	porin
ETAC_RS09805	8.2595	0	ETAC_09830	hypothetical protein
ETAC_RS12380	-7.23341	0	ETAC_12430	succinate dehydrogenase flavoprotein subunit
ETAC_RS15660	3.90052	0	ETAC_15595	intracellular growth attenuator protein IgaA
ETAC_RS13610	4.74156	3e-300	ETAC_13615	hydroxyacylglutathione hydrolase
ETAC_RS05545	7.49067	5.08e-289	ETAC_05490	hypothetical protein
ETAC_RS00850	-8.23807	2.51e-285	ETAC_00790	acetyl-CoA synthetase
ETAC_RS03425	4.16976	1.49e-274	ETAC_03360	bifunctional glycosyl transferase/transpeptidase
ETAC_RS01460	-7.0136	2.69e-272	ETAC_01435	lactate permease
ETAC_RS06245	6.44985	6.36e-250	ETAC_06205	hypothetical protein
ETAC_RS12040	5.26752	7.44e-238	ETAC_12115	ecotin
sdhB	-4.89365	5.82e-237	NA	NA
ETAC_RS11400	8.07209	1.48e-232	ETAC_11455	acid shock protein
ETAC_RS05030	-4.90821	5.21e-226	ETAC_04995	lactate dehydrogenase
ETAC_RS10020	-5.52961	3.74e-220	ETAC_10045	fumarate hydratase class I
ETAC_RS07260	7.175	5.59e-220	ETAC_07225	amino acid ABC transporter substrate-binding protein
ETAC_RS09860	7.59598	5.62e-219	ETAC_09890	lipoprotein
ETAC_RS06320	-8.05336	1.54e-207	ETAC_06280	iron ABC transporter substrate-binding protein
ETAC_RS08840	7.00517	1.65e-202	ETAC_08815	cystathionine gamma-lyase
ETAC_RS15075	7.86818	4.89e-194	ETAC_15045	hypothetical protein
ETAC_RS15700	-4.7774	2.47e-188	ETAC_15635	phosphoenolpyruvate carboxykinase
ETAC_RS07785	3.17151	5.59e-188	ETAC_07740	anhydro-N-acetylmuramic acid kinase
ETAC_RS10060	4.37547	2.67e-169	ETAC_10090	hypothetical protein
ETAC_RS05475	4.17952	5.32e-169	ETAC_05450	cysteine biosynthesis protein CysZ
ETAC_RS05415	-3.74153	2.64e-166	ETAC_05390	malic enzyme
ETAC_RS09095	3.64176	1.62e-157	ETAC_09080	pre-peptidase
ETAC_RS05625	5.61272	4.31e-151	ETAC_05570	hypothetical protein
ETAC_RS06695	5.82054	3.41e-150	ETAC_06665	lipoprotein
putA	-5.55757	1.41e-148	NA	NA
ETAC_RS15095	4.32219	1.62e-144	ETAC_15065	sodium:proton antiporter
ETAC_RS05630	6.23468	4.11e-144	ETAC_05575	hypothetical protein
ETAC_RS01370	-5.77206	3.39e-142	ETAC_01340	aspartate ammonia-lyase
ETAC_RS06040	3.48848	1.49e-138	ETAC_06000	3-hydroxydecanoyl-ACP dehydratase
ETAC_RS06285	-7.78872	4.33e-133	ETAC_06245	phosphoglycerate transporter
ETAC_RS08485	-4.38339	5e-132	ETAC_08455	thiosulfate reductase PhsA
ETAC_RS16080	-5.74332	3.22e-131	ETAC_16020	LacI family transcriptional regulator
ETAC_RS07675	-5.9634	1.26e-129	ETAC_07635	proline:sodium symporter
ETAC_RS06315	-5.22043	1.29e-129	ETAC_06275	Ferric iron ABC transporter permease
ETAC_RS15705	2.97968	1.05e-128	ETAC_15640	two-component system sensor histidine kinase
ETAC_RS09715	-3.06794	8.65e-128	ETAC_09740	isocitrate dehydrogenase
ETAC_RS12370	-2.27553	4.9e-124	ETAC_12420	2-oxoglutarate dehydrogenase E1 component
ETAC_RS08690	3.24808	7.58e-122	ETAC_08665	universal stress protein
ETAC_RS16140	5.05261	7.58e-122	ETAC_16080	hypothetical protein
ETAC_RS07480	4.17296	2.93e-121	ETAC_07435	penicillin-binding protein 2
ETAC_RS10315	4.37958	1.29e-115	ETAC_10350	formate transporter FocA
ETAC_RS08835	7.27845	2.74e-115	ETAC_08810	cystathionine beta-lyase
ETAC_RS07015	-5.28238	8.61e-115	ETAC_06990	hypothetical protein
ETAC_RS11190	-3.04216	1.37e-112	ETAC_11245	NADH dehydrogenase subunit G
ETAC_RS01740	-4.45926	1.07e-108	ETAC_01705	malate dehydrogenase
ETAC_RS10455	2.41655	9.01e-108	ETAC_10490	hypothetical protein
ETAC_RS16265	3.90769	2.67e-105	ETAC_16200	regulatory protein UhpC
ETAC_RS07255	7.12843	3.64e-104	ETAC_07220	amino acid ABC transporter permease
ETAC_RS01665	2.76889	8.94e-103	ETAC_01625	hypothetical protein
ETAC_RS12005	-6.92204	8.5e-102	ETAC_12080	carbon starvation protein A
ETAC_RS11205	-3.11134	3.19e-101	ETAC_11260	bifunctional NADH:ubiquinone oxidoreductase subunit C/D
ETAC_RS12530	-3.1985	1.9e-100	ETAC_12575	PTS N-acetyl glucosamine transporter subunit IIABC
ETAC_RS05605	4.01794	2.15e-100	ETAC_05550	hypothetical protein
ETAC_RS12355	-2.90529	2.83e-100	ETAC_12405	succinyl-CoA synthetase subunit alpha
ETAC_RS02780	-3.34888	4.93e-100	ETAC_02705	protein acetyltransferase
ETAC_RS10945	2.52152	5.48e-100	ETAC_10995	transporter
ETAC_RS12745	3.21788	1.6e-96	ETAC_12755	nickel transporter
ETAC_RS03090	-4.05475	2.55e-96	ETAC_03020	long-chain fatty acid--CoA ligase
ETAC_RS04405	-5.72874	2.75e-96	ETAC_04350	hemolysin
ETAC_RS07575	-4.02388	3.69e-96	ETAC_07535	tetrathionate reductase subunit A
ushA	-3.99761	5.47e-96	NA	NA
ETAC_RS12215	-4.83448	5.03e-95	ETAC_12290	molybdate transporter periplasmic protein
ETAC_RS01455	-8.399	6.99e-94	ETAC_01430	hypothetical protein
ETAC_RS06600	2.68292	8.99e-92	ETAC_06570	hypothetical protein
ETAC_RS05695	2.36479	1.15e-91	ETAC_05645	ATPase
ETAC_RS06300	3.06596	3.41e-91	ETAC_06260	hypothetical protein
ETAC_RS01365	-5.16442	3.29e-89	ETAC_01335	C4-dicarboxylate ABC transporter
ETAC_RS15990	-4.39739	4.19e-89	ETAC_15930	formate dehydrogenase subunit alpha
ETAC_RS10930	2.69299	1.06e-88	ETAC_10980	AraC family transcriptional regulator
ETAC_RS10950	2.55437	8.49e-87	ETAC_11000	multidrug ABC transporter ATP-binding protein
ETAC_RS12260	-6.43037	5.69e-86	ETAC_12335	hypothetical protein
ETAC_RS07400	3.40697	6.94e-86	ETAC_07355	transporter
ETAC_RS08685	5.80591	1.45e-85	ETAC_08660	hypothetical protein
ETAC_RS14260	3.9534	5.55e-85	ETAC_14210	hypothetical protein
ETAC_RS00640	-4.69674	9.86e-85	ETAC_00635	(alpha)-aspartyl dipeptidase
ETAC_RS09480	6.46806	5.05e-84	ETAC_09485	chaperone protein HchA
ETAC_RS07125	-4.50566	5.11e-84	ETAC_07090	peptide ABC transporter substrate-binding protein
ETAC_RS07895	-3.05588	5.38e-84	ETAC_07845	fumarate hydratase
ETAC_RS07365	2.67557	2.84e-81	ETAC_07330	signaling protein
ETAC_RS15820	-2.60799	6.34e-81	ETAC_15755	transcriptional regulator MalT
ETAC_RS12360	-2.92541	1.52e-80	ETAC_12410	malate--CoA ligase subunit beta
ETAC_RS01445	-7.55335	1.83e-79	ETAC_01420	hypothetical protein
ETAC_RS08740	-3.83136	2.06e-77	ETAC_08710	Universal stress protein G
ETAC_RS01175	3.64167	3.75e-77	ETAC_01130	glutaminase
ETAC_RS06275	-5.15349	2.49e-76	ETAC_06235	two-component system sensor histidine kinase
ETAC_RS10700	2.63041	3.55e-76	ETAC_10755	bifunctional histidinal dehydrogenase/ histidinol dehydrogenase
ETAC_RS02290	3.586	5.53e-76	ETAC_02250	hypothetical protein
ETAC_RS02520	3.34074	9.51e-76	ETAC_02465	anti-sigma-factor antagonist
ETAC_RS14125	5.13751	3.12e-75	ETAC_14075	outer membrane protein
ETAC_RS07010	-6.78294	7.56e-75	ETAC_06985	methionine sulfoxide reductase B
ETAC_RS08915	4.17471	9.35e-75	ETAC_08895	acetyltransferase
ETAC_RS11210	-2.99668	5.49e-74	ETAC_11265	NADH-quinone oxidoreductase subunit B
ETAC_RS01495	-4.22284	7.01e-74	ETAC_01470	fumarate reductase flavoprotein subunit
ETAC_RS06455	2.26936	2.61e-73	ETAC_06420	acid phosphatase
emrB	2.48588	3.08e-73	NA	NA
ETAC_RS08855	-3.76993	4.34e-73	ETAC_08830	phosphatidylserine decarboxylase
ETAC_RS14200	-4.67038	8.9e-72	ETAC_14150	glycine dehydrogenase
ETAC_RS14475	-3.18537	1.07e-70	ETAC_14440	hydrogenase 2 large subunit
ETAC_RS10695	3.28436	1.61e-70	ETAC_10750	ATP phosphoribosyltransferase
ETAC_RS10915	2.68832	2.24e-70	ETAC_10965	universal stress protein UspA
ETAC_RS16180	-5.58753	2.37e-70	ETAC_16120	C4-dicarboxylate ABC transporter
ETAC_RS16365	2.19279	3.1e-70	ETAC_16300	ATP-dependent protease
ETAC_RS08250	-2.98914	5.16e-70	ETAC_08210	phosphoenolpyruvate synthase
ETAC_RS15200	2.59289	5.96e-70	ETAC_15170	thiamin phosphate synthase
ETAC_RS08775	3.06087	7.99e-70	ETAC_08750	hypothetical protein
ETAC_RS03195	2.4072	6.3e-69	ETAC_03125	SecA regulator SecM
ETAC_RS06280	-5.04662	6.3e-69	ETAC_06240	ABC transporter substrate-binding protein
ETAC_RS12205	-4.49269	1.79e-68	ETAC_12280	molybdate transporter ATP-binding protein
ETAC_RS07200	-6.41474	2.3e-68	ETAC_07165	outer membrane protein W
ETAC_RS00845	-7.13797	6.56e-68	ETAC_00785	hypothetical protein
ETAC_RS12390	-7.65851	1.86e-67	ETAC_12440	succinate dehydrogenase cytochrome b556 large membrane subunit
ETAC_RS10710	2.39902	3.16e-67	ETAC_10765	imidazoleglycerol-phosphate dehydratase
ETAC_RS15175	-4.48653	3.25e-67	ETAC_15145	transcriptional regulator
ETAC_RS14210	-5.22455	4.77e-67	ETAC_14160	glycine cleavage system protein T
ETAC_RS13655	2.57521	6.03e-67	ETAC_13630	chaperone protein ClpB
modB	-3.9093	1.17e-66	NA	NA
ETAC_RS05830	-5.69931	1.2e-66	ETAC_05785	DgsA anti-repressor MtfA
ETAC_RS10615	2.32181	3.76e-66	ETAC_10650	transporter
ETAC_RS04590	5.96111	3.36e-65	ETAC_04535	hypothetical protein
ETAC_RS06180	2.02678	9.63e-65	ETAC_06140	4-amino-4-deoxy-L-arabinose transferase
ETAC_RS01265	-4.51714	1.11e-64	ETAC_01225	DNA-binding transcriptional activator FucR
ETAC_RS12735	2.39101	3.35e-64	ETAC_12745	hypothetical protein
ETAC_RS13075	-3.40773	1.14e-63	ETAC_13090	membrane protein
ETAC_RS03600	-3.81444	1.46e-63	ETAC_03520	hypothetical protein
ETAC_RS13695	-2.88239	6.24e-63	ETAC_13670	two-component system response regulator
ETAC_RS06915	-3.01732	1.52e-62	ETAC_06890	hypothetical protein
ETAC_RS00085	3.71022	6.3e-62	ETAC_00085	hypothetical protein
ETAC_RS11185	-2.26177	2.3e-61	ETAC_11240	NADH-quinone oxidoreductase subunit H
ETAC_RS17120	3.01118	1.94e-60	ETAC_17005	phosphate ABC transporter substrate-binding protein
ETAC_RS13085	-2.86062	2.95e-60	ETAC_13100	peptidase M20
ETAC_RS11195	-3.76315	5.54e-60	ETAC_11250	NADH dehydrogenase subunit F
ETAC_RS00110	2.23532	7.91e-60	ETAC_00110	hypothetical protein
ETAC_RS01955	2.99631	1.13e-59	ETAC_01915	membrane protein
ETAC_RS07790	4.14197	1.48e-59	ETAC_07745	hypothetical protein
ETAC_RS06325	-7.51476	2.35e-59	ETAC_06285	MFS transporter
ETAC_RS01700	2.38433	4.54e-59	ETAC_01665	membrane protein
ETAC_RS06800	2.10655	2.09e-58	ETAC_06775	zinc ABC transporter ATPase
ETAC_RS12365	-2.31674	5.28e-58	ETAC_12415	dihydrolipoamide succinyltransferase
ETAC_RS10305	-4.14201	6.69e-58	ETAC_10340	L-asparaginase
ETAC_RS10955	3.33672	3.12e-57	ETAC_11005	ABC transporter permease
ETAC_RS14190	3.63871	4.02e-57	ETAC_14140	hemolysin
ETAC_RS15710	3.16789	4.19e-57	ETAC_15645	two-component system response regulator
ETAC_RS04400	-5.64855	1.12e-56	ETAC_04345	hemolysin activation protein
ETAC_RS12655	-3.89459	1.24e-56	ETAC_12665	ribonucleoside hydrolase 1
ETAC_RS11010	2.90305	2.31e-56	ETAC_11060	membrane protein
ETAC_RS13615	2.34546	2.91e-56	NA	murein transglycosylase
ETAC_RS05435	3.10549	3.38e-56	ETAC_05410	N-acetylmuramoyl-L-alanine amidase
ETAC_RS08410	4.8054	5.61e-56	ETAC_08380	porin
ETAC_RS11215	-2.90914	1.83e-55	ETAC_11270	NADH:ubiquinone oxidoreductase subunit A
ETAC_RS04230	-5.9919	1.24e-54	ETAC_04175	type III secretion protein
ETAC_RS10320	4.2813	1.58e-54	ETAC_10355	keto-acid formate acetyltransferase
ETAC_RS10755	-7.09876	1.72e-54	ETAC_10810	tryptophan permease
ETAC_RS14800	-2.15389	3.15e-54	ETAC_14770	multifunctional aminopeptidase A
ETAC_RS01720	-3.318	1.88e-52	ETAC_01685	fructose 1,6-bisphosphatase
ETAC_RS04365	4.64357	4.38e-52	ETAC_04310	conjugal transfer surface exclusion protein TraT
ETAC_RS17165	-3.9268	1.07e-51	ETAC_17050	hypothetical protein
ETAC_RS14585	4.44768	1.21e-51	ETAC_14565	sodium/hydrogen exchanger family protein
ETAC_RS11200	-3.07225	6.2e-51	ETAC_11255	NADH dehydrogenase subunit E
ETAC_RS01735	2.96068	8.94e-51	ETAC_01700	arginine repressor
flgE	-7.13159	1.07e-50	NA	NA
ETAC_RS05980	2.01054	2.76e-50	ETAC_05935	hypothetical protein
ETAC_RS12830	-3.29595	2.82e-50	ETAC_12845	molybdenum transporter ModD
ETAC_RS12815	-3.01855	3.48e-50	ETAC_12830	acetyl esterase
ETAC_RS05320	2.48767	7.22e-50	ETAC_05295	multidrug efflux RND transporter permease subunit
ETAC_RS08830	2.35751	1.72e-49	ETAC_08805	hypothetical protein
ETAC_RS06460	2.80231	2.2e-49	ETAC_06425	fumarylacetoacetate hydrolase
ETAC_RS11450	-5.19887	4.45e-49	ETAC_11505	type VI secretion protein EvpB
ETAC_RS06270	-5.91747	4.77e-49	ETAC_06230	transcriptional regulator
ETAC_RS00980	4.96312	4.86e-49	ETAC_00925	antiporter
ETAC_RS00990	4.98589	5.77e-49	ETAC_00935	2-(5''-triphosphoribosyl)-3'-dephospho-CoA synthase
ETAC_RS08120	-3.04256	2.21e-48	ETAC_08070	glucose-1-phosphatase/inositol phosphatase
ETAC_RS06500	3.54241	5.7e-48	NA	catalase
ETAC_RS04240	-5.35611	1.36e-47	ETAC_04185	secretion protein EspA
ETAC_RS10705	2.3141	2.58e-47	ETAC_10760	histidinol-phosphate aminotransferase
ETAC_RS07745	-2.70943	2.59e-47	ETAC_07700	superoxide dismutase
ETAC_RS01705	2.20532	2.78e-47	ETAC_01670	hypothetical protein
ETAC_RS08860	-4.32931	3.58e-47	ETAC_08835	arginine:agmatine antiporter
ETAC_RS06595	-4.99282	9.44e-47	ETAC_06565	membrane protein
ETAC_RS15995	-2.85802	3.09e-46	ETAC_15935	formate dehydrogenase subunit alpha
ETAC_RS15850	-3.14761	5.5e-46	ETAC_15785	glucose-1-phosphate adenylyltransferase
ETAC_RS13120	2.64629	2.51e-45	ETAC_13135	two-component system sensor histidine kinase/response regulator
ETAC_RS09850	2.86474	5.19e-45	ETAC_09880	acetyl-CoA carboxylase
ETAC_RS07215	-6.31924	3.67e-44	ETAC_07180	tryptophan synthase subunit beta
ETAC_RS12635	-6.4455	8.32e-44	ETAC_12645	glutamate ABC transporter substrate-binding protein
ETAC_RS02000	-3.30525	8.84e-43	ETAC_01960	serine/threonine protein kinase
ETAC_RS11550	-4.3309	9.93e-43	ETAC_11605	long-chain fatty acid outer membrane transporter
ETAC_RS11485	-3.2799	1.22e-42	ETAC_11540	type VI secretion protein
ETAC_RS11460	-4.93932	3.38e-42	ETAC_11515	type VI secretion system protein EvpD
ETAC_RS06835	2.35541	4.34e-42	ETAC_06810	glucose-6-phosphate 1-dehydrogenase
ETAC_RS14480	-3.33559	6.06e-42	ETAC_14445	hydrogenase
ETAC_RS16100	-2.63662	6.47e-42	ETAC_16040	ribulokinase
ETAC_RS08155	3.66329	1.28e-41	ETAC_08115	hypothetical protein
ETAC_RS14185	-4.13171	1.73e-41	ETAC_14135	ion channel protein Tsx
ETAC_RS06305	3.20581	2.8e-41	ETAC_06265	peptidoglycan glycosyltransferase
ETAC_RS11480	-3.58851	6.26e-41	ETAC_11535	type VI secretion system protein EvpH
ETAC_RS14465	-3.75818	6.65e-41	ETAC_14430	hydrogenase 1 maturation protease
ETAC_RS17125	3.59678	6.98e-41	ETAC_17010	phosphate transporter permease subunit PstC
ETAC_RS15325	2.33211	3.73e-40	ETAC_15255	Trk system potassium uptake protein
ETAC_RS10740	-2.26339	4.07e-40	ETAC_10795	Trimethylamine-N-oxide reductase
ETAC_RS06400	-3.75764	8.24e-40	ETAC_06365	two-component system protein-glutamate methylesterase response regulator
ETAC_RS15675	2.14681	1.08e-39	ETAC_15610	heat-shock protein 33 Hsp33
ETAC_RS05090	2.53814	1.55e-39	ETAC_05055	hypothetical protein
ETAC_RS08085	4.21955	1.59e-39	NA	hypothetical protein
ETAC_RS16925	2.39365	2.2e-39	ETAC_16845	serine/threonine protein kinase
ETAC_RS04085	2.44856	2.63e-39	ETAC_04025	1-acyl-sn-glycerol-3-phosphate acyltransferase
ETAC_RS16830	2.12622	3.02e-39	ETAC_16745	phosphoenolpyruvate carboxylase
ETAC_RS05115	2.19329	3.57e-39	ETAC_05085	two-component system response regulator
ETAC_RS10960	2.6371	4.49e-39	ETAC_11010	membrane protein
ETAC_RS10085	-5.94082	4.96e-39	ETAC_10115	flagellar hook-associated protein FliD
ETAC_RS14105	3.19124	5.46e-39	ETAC_14060	Lipid A biosynthesis lauroyl acyltransferase
ETAC_RS01180	4.80225	1.05e-38	ETAC_01135	hypothetical protein
ETAC_RS08445	3.92531	1.08e-38	ETAC_08415	cyclopropane fatty acyl phospholipid synthase
ETAC_RS17090	-2.67352	1.51e-38	ETAC_16975	ATP synthase subunit gamma
ETAC_RS07840	2.34901	1.95e-38	ETAC_07790	electron transporter RnfG
ETAC_RS16055	-3.05443	2.5e-38	ETAC_15995	universal stress protein A
ETAC_RS04520	3.12349	2.6e-38	ETAC_04465	hypothetical protein
ETAC_RS07885	2.04325	2.62e-38	ETAC_07835	GTP-binding protein
ETAC_RS02515	2.64276	3.27e-38	ETAC_02460	organic solvent ABC transporter substrate-binding protein
ETAC_RS14470	-3.31166	4.81e-38	ETAC_14435	hydrogenase 1 b-type cytochrome subunit
ETAC_RS13070	2.21037	7.76e-38	ETAC_13085	thioredoxin
ETAC_RS01540	2.50391	1.71e-37	ETAC_01500	epoxyqueuosine reductase
ETAC_RS09205	-2.96447	2.1e-37	ETAC_09190	PAS domain-containing two-component system sensor histidine kinase
ETAC_RS13860	2.3777	3.11e-37	ETAC_13810	glutamate decarboxylase
ETAC_RS14455	-4.03758	3.81e-37	ETAC_14420	hydrogenase-1 operon protein HyaF
fbpC	-6.4813	4.44e-37	NA	NA
ETAC_RS14205	-6.11437	6.2e-37	ETAC_14155	glycine cleavage system protein H
ETAC_RS12385	-7.64905	1.92e-36	ETAC_12435	succinate dehydrogenase cytochrome b556 small membrane subunit
ETAC_RS12395	-2.39527	1.93e-36	ETAC_12445	type II citrate synthase
flgF	-6.92959	2.11e-36	NA	NA
ETAC_RS15840	-2.48664	2.78e-36	ETAC_15775	glycogen branching enzyme
ETAC_RS06390	-4.50889	3.84e-36	ETAC_06355	methyl-accepting chemotaxis protein
ETAC_RS07430	-2.79853	3.87e-36	ETAC_07385	Fructosamine kinase
ETAC_RS16300	-4.16237	4.79e-36	ETAC_16235	universal stress protein
ETAC_RS07235	-6.06193	5.48e-36	ETAC_07200	anthranilate synthase component I
ETAC_RS17095	-2.3193	9.71e-36	ETAC_16980	ATP synthase subunit beta
ETAC_RS06680	-3.41048	1.62e-35	ETAC_06645	diguanylate cyclase
ETAC_RS15070	4.2221	1.65e-35	ETAC_15040	hypothetical protein
ETAC_RS02680	-2.05642	1.97e-35	ETAC_02625	heme ABC transporter ATP-binding protein
ETAC_RS11470	-3.27875	3.89e-35	ETAC_11525	type VI secretion system protein EvpF
ETAC_RS05790	2.25997	4.13e-35	ETAC_05775	hypothetical protein
ETAC_RS15565	2.2401	4.93e-35	ETAC_15500	peptidyl-prolyl cis-trans isomerase
ETAC_RS05915	-5.90061	8.67e-35	ETAC_05870	flagellar hook protein FlgK
ETAC_RS07565	-3.23255	1.25e-34	ETAC_07525	tetrathionate reductase subunit B
ETAC_RS06375	-5.27729	2.59e-34	ETAC_06340	chemotaxis protein CheA
ETAC_RS16095	-3.71142	2.62e-34	ETAC_16035	sugar ABC transporter permease
artP	-4.77977	4.36e-34	NA	NA
ETAC_RS12750	3.84359	4.52e-34	ETAC_12765	lytic transglycosylase
ETAC_RS15165	-8.19266	4.92e-34	ETAC_15135	diaminopropionate ammonia-lyase
ETAC_RS04225	-4.80195	5.72e-34	ETAC_04170	protein EseD
ETAC_RS08200	2.78385	6.53e-34	ETAC_08160	methyltransferase
ETAC_RS03200	2.4064	9.58e-34	ETAC_03130	preprotein translocase subunit SecA
ETAC_RS10080	-7.05605	1.4e-33	ETAC_10110	flagellar biosynthesis protein
ETAC_RS12760	-2.79867	1.78e-33	ETAC_12775	crotonobetaine/carnitine-CoA ligase
ETAC_RS01875	2.3898	2.02e-33	ETAC_01830	RNA helicase
ETAC_RS15655	2.16333	2.37e-33	ETAC_15590	adenosine nucleotide hydrolase
ETAC_RS02430	-2.78108	6.25e-33	ETAC_02375	cytochrome B562
ETAC_RS07760	2.44189	7.32e-33	ETAC_07715	permease
ETAC_RS11100	2.93056	7.39e-33	ETAC_11150	dipeptidase
ETAC_RS16135	2.85194	1.42e-32	ETAC_16075	methyl-accepting chemotaxis protein
ETAC_RS10125	-6.34822	1.43e-32	ETAC_10155	flagellar MS-ring protein
ETAC_RS10920	2.58465	1.45e-32	ETAC_10970	inorganic pyrophosphatase
ETAC_RS04335	-3.71635	1.71e-32	ETAC_04280	threonine/serine transporter TdcC
ETAC_RS15985	-2.33629	1.71e-32	ETAC_15925	formate dehydrogenase accessory protein
ETAC_RS09055	-5.98063	2.08e-32	ETAC_09035	ribokinase
ETAC_RS02050	-2.52615	2.82e-32	ETAC_02010	pyruvate formate-lyase
ETAC_RS04245	-5.0057	2.93e-32	ETAC_04190	hypothetical protein
ETAC_RS04415	-3.07198	4.08e-32	ETAC_04360	formate acetyltransferase 2
ETAC_RS00935	-2.12602	4.61e-32	ETAC_00880	sugar ABC transporter substrate-binding protein
ETAC_RS07995	2.02913	5.45e-32	ETAC_07950	peptidase C69
ETAC_RS03445	2.82081	1.32e-31	NA	membrane protein
ETAC_RS15880	-3.11947	1.49e-31	ETAC_15815	thiosulfate sulfurtransferase
ETAC_RS16755	-3.50248	3.42e-31	ETAC_16670	phosphotransferase
ETAC_RS05130	2.31518	7.08e-31	ETAC_05100	multidrug resistance protein MdtB
ETAC_RS01000	7.79163	9e-31	ETAC_00945	citrate lyase subunit beta
ETAC_RS16165	-5.9304	1.26e-30	ETAC_16105	cyclic di-GMP phosphodiesterase
ETAC_RS16085	-4.84295	1.55e-30	ETAC_16025	sugar ABC transporter ATP-binding protein
ETAC_RS06365	-6.03591	1.66e-30	ETAC_06330	flagellar motor protein MotA
ETAC_RS14070	-2.93677	3.16e-30	ETAC_14025	diaminopimelate decarboxylase
ETAC_RS11040	-2.22726	4.24e-30	ETAC_11090	hypothetical protein
ETAC_RS08385	-2.38943	4.72e-30	ETAC_08350	hypothetical protein
ETAC_RS08620	2.31775	4.96e-30	ETAC_08595	NADPH quinone reductase MdaB
ETAC_RS06445	-3.45445	5.88e-30	ETAC_06410	transcriptional regulator
ETAC_RS07570	-4.23147	6.22e-30	ETAC_07530	tetrathionate reductase subunit C
ETAC_RS15100	-3.82674	6.73e-30	ETAC_15070	permease
ETAC_RS17150	-3.13622	8.31e-30	ETAC_17035	cryptic adenine deaminase
ETAC_RS11335	-2.09741	9.69e-30	ETAC_11390	epimerase
ETAC_RS02510	2.57884	1.08e-29	ETAC_02455	outer membrane lipid asymmetry maintenance protein MlaD
ETAC_RS10150	-6.40828	1.13e-29	ETAC_10180	flagellar hook-length control protein
ETAC_RS06070	2.33498	1.97e-29	ETAC_06030	membrane protein
ETAC_RS13855	2.58037	2.34e-29	ETAC_13805	amino acid transporter
ETAC_RS14080	-7.32847	3.19e-29	ETAC_14035	exported sulfatase
ETAC_RS01895	-3.53907	5.59e-29	ETAC_01850	protease
ETAC_RS15870	-2.31628	6.25e-29	ETAC_15805	transcriptional regulator
ETAC_RS07680	2.68067	8.63e-29	NA	silver-binding protein; silver resistance
ETAC_RS02435	-2.955	8.75e-29	ETAC_02380	nickel-dependent hydrogenase cytochrome b-type subunit
ETAC_RS15060	4.0733	1.05e-28	ETAC_15030	hypothetical protein
ETAC_RS08625	-4.29457	1.81e-28	ETAC_08600	peptidase T
ETAC_RS14865	-4.78256	1.85e-28	ETAC_14835	hypothetical protein
ETAC_RS05975	-3.15465	2.28e-28	ETAC_05930	hypothetical protein
ETAC_RS07220	-6.17631	2.62e-28	ETAC_07185	bifunctional indole-3-glycerol phosphate synthase/phosphoribosylanthranilate isomerase
ETAC_RS04880	3.17289	2.82e-28	ETAC_04840	hypothetical protein
ETAC_RS11455	-5.04552	4.35e-28	ETAC_11510	type VI secretion protein
ETAC_RS09280	3.64156	6.23e-28	ETAC_09270	zinc protease
ETAC_RS06330	-3.33409	6.75e-28	ETAC_06290	Sensor histidine protein kinase UhpB, glucose-6-phosphate specific
ETAC_RS06100	2.17922	6.81e-28	ETAC_06060	heat-shock protein HspQ
ETAC_RS10825	2.15604	7.82e-28	ETAC_10880	ADP-ribose pyrophosphatase
ETAC_RS10940	2.1244	1.19e-27	ETAC_10990	DNA-binding transcriptional regulator
ETAC_RS01005	7.06622	1.35e-27	ETAC_00950	citrate lyase ACP
ETAC_RS05895	-6.88508	1.7e-27	ETAC_05850	flagellar basal body rod protein FlgG
ETAC_RS00105	2.76379	2.47e-27	ETAC_00105	hypothetical protein
ETAC_RS06940	3.09106	3.06e-27	ETAC_06915	hypothetical protein
ETAC_RS11445	-5.8118	3.11e-27	ETAC_11500	type VI secretion protein
ETAC_RS08770	-3.89306	4.21e-27	ETAC_08745	hexuronate transporter ExuT
ETAC_RS04330	-5.12948	4.59e-27	ETAC_04275	threonine dehydratase
ETAC_RS01260	-2.49202	4.9e-27	ETAC_01215	hypothetical protein
ETAC_RS11505	-3.04078	5.29e-27	ETAC_11560	type VI secretion protein
ETAC_RS05420	-4.33745	5.37e-27	ETAC_05395	hypothetical protein
ETAC_RS00995	6.04029	5.93e-27	ETAC_00940	citrate lyase subunit alpha
ETAC_RS01485	-4.13437	9.36e-27	ETAC_01460	fumarate reductase subunit C
ETAC_RS10130	-6.49946	1.35e-26	ETAC_10160	flagellar motor switch protein FliG
ETAC_RS12825	-2.94742	1.35e-26	ETAC_12840	methyltransferase
ETAC_RS07225	-6.86731	3.04e-26	ETAC_07190	anthranilate phosphoribosyltransferase
ETAC_RS10790	-4.29623	3.12e-26	ETAC_10845	hypothetical protein
ETAC_RS04465	-8.07016	3.83e-26	ETAC_04410	hypothetical protein
ETAC_RS04215	-4.67554	5.33e-26	ETAC_04160	protein EscB
ETAC_RS05125	2.42753	6.84e-26	ETAC_05095	multidrug efflux system subunit MdtC
ETAC_RS06380	-5.11465	8.25e-26	ETAC_06345	purine-binding chemotaxis protein
ETAC_RS04325	-4.85447	9.76e-26	ETAC_04270	DNA-binding transcriptional activator TdcA
ETAC_RS17130	2.91576	1.02e-25	ETAC_17015	phosphate transporter permease subunit PtsA
ETAC_RS01425	2.91371	1.31e-25	ETAC_01395	invasin
ETAC_RS06920	-2.65838	1.35e-25	ETAC_06895	hypothetical protein
ETAC_RS06150	2.94002	1.63e-25	ETAC_06110	hypothetical protein
ETAC_RS17135	2.62043	1.71e-25	ETAC_17020	phosphate import ATP-binding protein PstB
ETAC_RS11500	-2.65477	1.98e-25	ETAC_11555	type VI secretion protein
ETAC_RS04310	-2.09657	2.1e-25	ETAC_04255	transcriptional regulator
ETAC_RS10730	2.5122	2.9e-25	ETAC_10785	phosphoribosyl-AMP cyclohydrolase
gpmA	2.30018	3.4e-25	NA	NA
ETAC_RS01110	-3.19954	3.65e-25	ETAC_01055	nitrate reductase A subunit alpha
ETAC_RS05040	-2.11242	3.82e-25	ETAC_05005	pyridine nucleotide-disulfide oxidoreductase
ETAC_RS06550	-6.84728	3.84e-25	ETAC_06520	nickel ABC transporter substrate-binding protein
ETAC_RS10075	-6.22597	3.84e-25	ETAC_10105	flagellar biosynthesis protein
fliA	-6.63847	7.61e-25	NA	NA
ETAC_RS15130	-9.35998	8.21e-25	ETAC_15100	selenate reductase subunit YgfK
ETAC_RS06355	-5.9591	1.28e-24	ETAC_06320	flagellar transcriptional regulator FlhD
ETAC_RS12015	-6.33093	1.92e-24	ETAC_12090	hypothetical protein
ETAC_RS15730	2.61154	2.77e-24	ETAC_15665	ferrous iron transporter B
ETAC_RS08475	-3.62476	2.96e-24	ETAC_08445	thiosulfate reductase cytochrome B subunit
ETAC_RS07870	-4.5514	3.99e-24	ETAC_07820	nucleoid-associated protein
ETAC_RS02060	-3.03906	4.21e-24	ETAC_02020	fructose-6-phosphate aldolase
tatE	2.74194	5.15e-24	NA	NA
ETAC_RS16785	-3.27937	5.73e-24	ETAC_16700	soluble pyridine nucleotide transhydrogenase
ETAC_RS10970	2.01262	1.02e-23	ETAC_11020	transcriptional regulator
ETAC_RS06360	-5.16704	1.17e-23	ETAC_06325	AraC family transcriptional regulator
ETAC_RS07435	-2.60703	1.22e-23	ETAC_07390	hypothetical protein
ETAC_RS06395	-4.47318	1.32e-23	ETAC_06360	chemotaxis protein CheR
ETAC_RS06155	-4.51262	1.33e-23	ETAC_06115	phospholipase D
ETAC_RS05860	-4.96784	1.48e-23	ETAC_05815	flagellar biosynthesis protein FlgM
ETAC_RS16150	2.88092	1.63e-23	ETAC_16090	hypothetical protein
ETAC_RS08920	2.74276	2.32e-23	ETAC_08900	capsular polysaccharide biosynthesis protein
ETAC_RS10055	3.69413	3.08e-23	ETAC_10080	aquaporin Z
ETAC_RS05870	-8.19653	3.34e-23	ETAC_05825	flagellar biosynthesis protein FlgB
ETAC_RS05855	-5.45824	3.52e-23	ETAC_05810	flagella synthesis protein
ETAC_RS03530	-2.15797	3.91e-23	ETAC_03450	murein transglycosylase
ETAC_RS16825	2.28607	5.12e-23	ETAC_16740	acetylornithine deacetylase
ETAC_RS02930	-4.60682	5.17e-23	ETAC_02855	xanthine dehydrogenase subunit XdhA
ETAC_RS01140	-4.3465	6.87e-23	ETAC_01095	putrescine transporter
ETAC_RS00985	4.75394	1.1e-22	ETAC_00930	2-(5''-triphosphoribosyl)-3'-dephosphocoenzyme-A synthase
ETAC_RS05970	-2.91485	1.32e-22	ETAC_05925	dihydroorotate dehydrogenase
ETAC_RS05120	2.06844	1.53e-22	ETAC_05090	two-component system sensor histidine kinase
ETAC_RS06465	4.27203	1.55e-22	ETAC_06430	citrate carrier protein
ETAC_RS10655	-2.22182	1.64e-22	ETAC_10710	L-serine dehydratase
ETAC_RS05840	-4.18376	1.84e-22	ETAC_05795	flagellar biosynthesis protein FlhB
ETAC_RS07230	-6.09637	2.77e-22	ETAC_07195	Anthranilate synthase amidotransferase component TrpAb
ETAC_RS08280	3.34101	3.35e-22	ETAC_08245	hemin transporter
ETAC_RS02420	2.15931	3.4e-22	ETAC_02365	phosphopentomutase
ETAC_RS11475	-3.47604	3.59e-22	ETAC_11530	type VI secretion system protein EvpG
ETAC_RS10965	2.09379	4.72e-22	ETAC_11015	tRNA(5-methylaminomethyl-2-thiouridylate) methyltransferase
ETAC_RS16295	-3.53632	7e-22	ETAC_16230	transcriptional regulator
ETAC_RS04235	-5.68139	1.13e-21	ETAC_04180	type III secretion protein
ETAC_RS15170	-8.87518	1.23e-21	ETAC_15140	ornithine carbamoyltransferase
ETAC_RS17160	-3.15404	1.47e-21	ETAC_17045	hypothetical protein
ETAC_RS14505	-2.37017	1.77e-21	ETAC_14485	hypothetical protein
ETAC_RS16920	2.17501	2.13e-21	ETAC_16840	periplasmic protein disulfide isomerase I
ETAC_RS04210	-3.2847	2.63e-21	ETAC_04155	hypothetical protein
ETAC_RS06220	-3.50471	3.59e-21	ETAC_06185	hypothetical protein
ETAC_RS15195	2.18236	3.65e-21	ETAC_15165	hypothetical protein
ETAC_RS12110	-3.74463	3.99e-21	ETAC_12185	PTS N-acetylgalactosamine transporter subunit IID
ETAC_RS10610	2.15005	5.04e-21	ETAC_10645	membrane protein
ETAC_RS07470	-2.04164	5.53e-21	ETAC_07425	substrate-binding transporter
ETAC_RS10735	-2.07323	6.25e-21	ETAC_10790	Functional role page for cytochrome c-type protein TorY
ETAC_RS01590	2.17327	7.46e-21	ETAC_01550	acyltransferase
flgL	-5.54513	7.61e-21	NA	NA
ETAC_RS07845	2.12271	9.15e-21	ETAC_07795	electron transport complex protein
ETAC_RS15855	-2.47597	1.6e-20	ETAC_15790	glycogen synthase
ETAC_RS05045	-2.91231	1.86e-20	ETAC_05010	transcriptional regulator
ETAC_RS00205	2.09546	2.04e-20	ETAC_00205	5-hydroxymethyluracil DNA glycosylase
ETAC_RS06405	-3.37261	2.6e-20	ETAC_06370	chemotaxis protein CheY
ETAC_RS17010	-3.53673	2.65e-20	ETAC_16895	D-ribose transporter ATP-binding protein
ETAC_RS08020	-3.75962	2.75e-20	ETAC_07975	methyl-accepting chemotaxis protein
ETAC_RS01490	-3.85845	2.96e-20	ETAC_01465	fumarate reductase iron-sulfur subunit
ETAC_RS02705	2.76063	3.4e-20	ETAC_02650	right origin-binding protein
ETAC_RS10240	-3.86444	4.7e-20	ETAC_10270	purine permease
ETAC_RS04220	-3.71766	8.51e-20	ETAC_04165	type III secretion protein
ETAC_RS05900	-5.31934	8.99e-20	ETAC_05855	flagellar basal body L-ring protein
ETAC_RS06035	2.05307	1.21e-19	ETAC_05990	hypothetical protein
ETAC_RS04135	-2.55019	1.32e-19	ETAC_04080	oxidoreductase molybdopterin-binding protein
ETAC_RS12085	-4.36227	1.32e-19	ETAC_12160	sulfatase
ETAC_RS06385	-3.90874	1.48e-19	ETAC_06350	methyl-accepting chemotaxis protein I
ETAC_RS06335	-2.08412	1.5e-19	ETAC_06295	transcriptional regulator
ETAC_RS12250	-3.6862	1.96e-19	ETAC_12325	galactokinase
ETAC_RS15725	2.46805	2.21e-19	ETAC_15660	iron transporter FeoA
ETAC_RS01315	2.59346	2.36e-19	ETAC_01285	trimethylamine N-oxide reductase I catalytic subunit
ETAC_RS03855	-2.19275	2.82e-19	ETAC_03785	transpeptidase
ETAC_RS02785	2.40163	3.4e-19	ETAC_02710	hypothetical protein
ETAC_RS01095	-2.57929	4.48e-19	ETAC_01040	nitrate reductase A subunit gamma
ETAC_RS10715	2.16964	5.6e-19	ETAC_10770	imidazole glycerol phosphate synthase subunit HisH
motB	-4.88595	5.75e-19	NA	NA
ETAC_RS16000	-2.47828	7.16e-19	ETAC_15940	formate dehydrogenase-N subunit beta
ETAC_RS15125	-7.30095	8.5e-19	ETAC_15095	chlorohydrolase/aminohydrolase
fliI	-6.77996	1.27e-18	NA	NA
ETAC_RS03905	-3.05516	1.69e-18	ETAC_03835	xanthine phosphoribosyltransferase
ETAC_RS08045	-3.77904	1.69e-18	ETAC_08000	sulfite reductase subunit alpha
ETAC_RS02920	-5.3173	2.06e-18	ETAC_02845	xanthine dehydrogenase subunit XdhC
ETAC_RS02925	-4.49556	2.12e-18	ETAC_02850	xanthine dehydrogenase subunit XdhB
flgI	-4.57357	2.37e-18	NA	NA
ETAC_RS14930	-2.48876	2.71e-18	ETAC_14900	aspartate carbamoyltransferase catalytic subunit
ETAC_RS06085	-2.80227	3.02e-18	ETAC_06045	methylglyoxal synthase
ETAC_RS04420	-3.0574	4.19e-18	ETAC_04365	pyruvate formate-lyase activating enzyme
ETAC_RS10235	-2.5729	4.28e-18	ETAC_10265	hydroxydechloroatrazine ethylaminohydrolase
ETAC_RS06450	-3.727	5.7e-18	ETAC_06415	hypothetical protein
ETAC_RS10160	-4.56368	6.29e-18	ETAC_10190	flagellar motor switch protein FliM
ETAC_RS15835	-2.15253	7.57e-18	ETAC_15770	glucose-1-phosphate adenylyltransferase
ETAC_RS12505	2.26861	8.09e-18	ETAC_12550	Fur family transcriptional regulator
ETAC_RS11130	-4.28906	8.75e-18	ETAC_11180	hydrogenase 2 small subunit
ETAC_RS11090	-2.00725	8.88e-18	ETAC_11140	isochorismate synthase
ETAC_RS06295	2.0032	9.11e-18	ETAC_06255	hydrolase
ETAC_RS06650	-3.526	9.93e-18	ETAC_06625	hypothetical protein
ETAC_RS10770	-2.13416	1.03e-17	ETAC_10825	D-mannonate oxidoreductase
ETAC_RS11305	-2.72025	1.04e-17	ETAC_11360	sulfurtransferase
ETAC_RS05845	-3.94763	1.16e-17	ETAC_05800	flagellar biosynthesis protein FlhA
ETAC_RS07990	-2.20016	1.16e-17	ETAC_07945	universal stress protein UspA
ETAC_RS12075	-5.45615	1.23e-17	ETAC_12150	fructose-bisphosphate aldolase
ETAC_RS04470	-6.5692	1.26e-17	ETAC_04415	ABC transporter
ETAC_RS05215	-3.02278	1.39e-17	ETAC_05190	uracil phosphoribosyltransferase
ETAC_RS12115	-4.96138	1.78e-17	ETAC_12190	PTS acetylgalactosamine transporter subunit IIC
ETAC_RS06535	-4.52604	1.81e-17	ETAC_06505	nickel transporter ATP-binding protein NikD
ETAC_RS13040	-5.26029	2.08e-17	ETAC_13055	N5-carboxyaminoimidazole ribonucleotide mutase
ETAC_RS08180	2.87537	2.13e-17	ETAC_08140	lactate dehydrogenase
ETAC_RS04480	-2.92806	3.11e-17	ETAC_04425	hypothetical protein
ETAC_RS08425	-2.4763	3.21e-17	ETAC_08395	diguanylate cyclase
ETAC_RS00120	-6.14061	4.81e-17	ETAC_00120	xanthine permease
ETAC_RS10165	-4.98035	6.3e-17	ETAC_10195	flagellar motor switch protein FliN
ETAC_RS11175	-2.60062	6.97e-17	ETAC_11230	NADH:ubiquinone oxidoreductase subunit J
ETAC_RS01125	4.33415	7.36e-17	ETAC_01075	hypothetical protein
ETAC_RS15580	-2.0365	9.44e-17	ETAC_15515	cytosine permease
ETAC_RS03740	3.50774	9.71e-17	ETAC_03670	peptide permease
ETAC_RS07850	2.18079	1.29e-16	ETAC_07800	electron transporter RnfB
ETAC_RS10095	-4.34637	1.35e-16	ETAC_10125	flagellar protein FliT
ETAC_RS01730	4.53629	1.43e-16	ETAC_01695	membrane protein
ETAC_RS18085	-3.4694	1.7e-16	NA	NA
ETAC_RS13080	-3.83773	1.9e-16	ETAC_13095	hypothetical protein
ETAC_RS01480	-3.26157	1.93e-16	ETAC_01455	fumarate reductase subunit D
ETAC_RS08630	-2.63932	2.26e-16	ETAC_08605	Fe3+/spermidine/putrescine ABC transporter ATP-binding protein
ETAC_RS07750	2.80248	2.57e-16	ETAC_07705	cell wall-associated hydrolase (invasion-associated protein)
ETAC_RS06540	-5.15997	2.63e-16	ETAC_06510	nickel transporter permease NikC
ETAC_RS08035	-3.81299	3.04e-16	ETAC_07990	sulfite reductase subunit C
ETAC_RS10605	2.27319	3.06e-16	ETAC_10640	glutaredoxin
ETAC_RS07135	-2.31148	3.27e-16	ETAC_07100	peptide ABC transporter permease
ETAC_RS06025	2.27869	3.39e-16	ETAC_05980	paraquat-inducible protein A
ETAC_RS14460	-3.55879	3.63e-16	ETAC_14425	hydrogenase-1 operon protein HyaE
ETAC_RS15925	-4.52118	4.38e-16	ETAC_15860	gluconate:proton symporter
cadB	3.5968	4.98e-16	NA	NA
ETAC_RS13675	2.08651	5.74e-16	ETAC_13650	cold-shock protein
ETAC_RS01085	2.42003	5.94e-16	ETAC_01030	membrane protein
ETAC_RS10090	-4.72607	6.51e-16	ETAC_10120	flagellar export chaperone FliS
ETAC_RS08480	-3.36555	6.84e-16	ETAC_08450	polysulfide reductase subunit B
ETAC_RS14550	-2.67347	8.07e-16	ETAC_14530	hypothetical protein
ETAC_RS11495	-3.29467	1.14e-15	ETAC_11550	type VI secretion system protein EvpK
ETAC_RS11330	-2.12518	1.16e-15	ETAC_11385	D-erythro-7,8-dihydroneopterin triphosphate 2'-epimerase
oppB	-2.22185	1.18e-15	NA	NA
ETAC_RS07210	-3.73893	1.38e-15	ETAC_07175	tryptophan synthase subunit alpha
ETAC_RS00520	-2.52134	1.52e-15	ETAC_00510	acetolactate synthase
ETAC_RS08925	2.93238	1.8e-15	ETAC_08905	capsular polysaccharide synthesis enzyme CpsB
ETAC_RS09735	-2.69703	1.8e-15	ETAC_09760	diguanylate cyclase
ETAC_RS10725	2.07968	1.84e-15	ETAC_10780	imidazole glycerol phosphate synthase subunit HisF
ETAC_RS12135	-3.01058	1.86e-15	ETAC_12210	DeoR family transcriptional regulator
ETAC_RS04115	-2.46712	2.18e-15	ETAC_04055	transcriptional regulator
ETAC_RS00525	2.40145	2.77e-15	ETAC_00515	threonine transporter RhtB
ETAC_RS15150	-4.09311	3.03e-15	ETAC_15120	carbamate kinase
ETAC_RS07935	-4.11661	4.13e-15	ETAC_07890	cytochrome c551 peroxidase
ETAC_RS01115	-3.12341	5.22e-15	ETAC_01060	nitrate transporter
ETAC_RS15160	-4.88802	5.71e-15	ETAC_15130	peptidase
ETAC_RS08785	-2.45217	7.15e-15	ETAC_08760	transcriptional regulator
ETAC_RS17155	-2.59484	9.27e-15	ETAC_17040	adenine permease
flgD	-8.97807	1.01e-14	NA	NA
ETAC_RS12235	-2.28155	1.15e-14	ETAC_12310	metal-dependent membrane protease
ETAC_RS03345	-2.73043	1.45e-14	ETAC_03275	tagatose-6-phosphate ketose isomerase
ETAC_RS06090	-2.30424	1.86e-14	ETAC_06050	hypothetical protein
ETAC_RS16090	-4.34741	1.94e-14	ETAC_16030	sugar ABC transporter permease
ETAC_RS08600	2.50216	2.02e-14	ETAC_08575	hypothetical protein
ETAC_RS12645	-4.65818	2.33e-14	ETAC_12655	glutamate/aspartate transporter permease GltK
ETAC_RS08215	-2.52369	2.4e-14	ETAC_08175	oxidoreductase Fe-S-binding subunit
ETAC_RS13045	-4.75943	2.51e-14	ETAC_13060	phosphoribosylaminoimidazole carboxylase ATPase subunit
fliJ	-6.61773	2.76e-14	NA	NA
ETAC_RS04105	-2.53417	2.77e-14	ETAC_04045	tryptophan permease
ETAC_RS16760	-4.09429	2.84e-14	ETAC_16675	porin
ETAC_RS17015	-5.87838	3.02e-14	ETAC_16900	D-ribose pyranase
ETAC_RS15875	-2.21662	3.82e-14	ETAC_15810	intramembrane serine protease GlpG
ETAC_RS07280	3.54764	4.11e-14	ETAC_07245	hypothetical protein
ETAC_RS11490	-3.42539	4.15e-14	ETAC_11545	type VI secretion protein
ETAC_RS10000	2.24887	4.87e-14	ETAC_10025	antibiotic biosynthesis monooxygenase
ETAC_RS04475	-8.11743	5.43e-14	ETAC_04420	iron ABC transporter ATP-binding protein
ETAC_RS17635	-3.39634	6.24e-14	NA	NA
ETAC_RS03040	2.5064	6.28e-14	ETAC_02965	hypothetical protein
ETAC_RS15155	-4.93958	9.1e-14	ETAC_15125	phenylhydantoinase
ETAC_RS15115	-4.66807	9.74e-14	ETAC_15085	hypoxanthine oxidase
ETAC_RS15140	-7.3975	1.06e-13	ETAC_15110	hypothetical protein
ETAC_RS09815	3.82612	1.28e-13	ETAC_09840	NADH dehydrogenase
ETAC_RS05985	2.13373	1.75e-13	ETAC_05940	hypothetical protein
ETAC_RS15120	-4.37138	1.82e-13	ETAC_15090	oxidoreductase
ETAC_RS05210	-5.25163	2.17e-13	ETAC_05185	phosphoribosylformylglycinamidine cyclo-ligase
ETAC_RS00820	-3.72522	2.34e-13	ETAC_00780	purine biosynthesis protein purH
ETAC_RS08910	-2.62416	2.43e-13	ETAC_08890	hypothetical protein
ETAC_RS06410	-2.94053	2.48e-13	ETAC_06375	chemotaxis protein CheZ
ETAC_RS18155	-2.57913	2.56e-13	NA	NA
ETAC_RS00545	2.32944	2.94e-13	ETAC_00535	cadmium-transporting ATPase
ETAC_RS07880	2.95347	3.6e-13	ETAC_07830	adenosine deaminase
ETAC_RS12640	-7.11854	3.8e-13	ETAC_12650	glutamate/aspartate ABC transporter permease GltJ
ETAC_RS00815	-4.45628	4.09e-13	ETAC_00775	phosphoribosylamine--glycine ligase
ETAC_RS11125	-5.04774	4.54e-13	ETAC_11175	hydrogenase
ETAC_RS05205	-5.31933	5.08e-13	ETAC_05180	phosphoribosylglycinamide formyltransferase
ETAC_RS06965	-2.41764	5.14e-13	ETAC_06940	universal stress protein
ETAC_RS04340	-2.55955	6.13e-13	ETAC_04285	propionate kinase
ETAC_RS14400	-4.35396	7.63e-13	ETAC_14360	Nucleoside permease NupG
ETAC_RS16750	-3.17413	8.11e-13	ETAC_16665	5'-nucleotidase
ETAC_RS08850	-2.13777	8.95e-13	ETAC_08825	hypothetical protein
ETAC_RS08960	2.2721	9.66e-13	ETAC_08940	phosphonate ABC transporter substrate-binding protein
ETAC_RS09810	2.60328	1.07e-12	ETAC_09835	drug/metabolite transporter (DMT) superfamily permease
ETAC_RS08040	-4.29289	1.25e-12	ETAC_07995	sulfite reductase subunit beta
ETAC_RS04110	-2.35904	1.38e-12	ETAC_04050	tryptophanase
ETAC_RS04450	-3.78618	1.66e-12	ETAC_04395	C4-dicarboxylate ABC transporter
ETAC_RS03360	-2.2445	2.1e-12	ETAC_03290	PTS N-acetylgalactosamine transporter subunit IID
ETAC_RS02395	-2.13621	2.41e-12	ETAC_02340	nucleoside transporter NupC
ETAC_RS01280	-3.32084	2.82e-12	ETAC_01240	L-fucose isomerase
ETAC_RS01105	-3.74011	2.88e-12	ETAC_01050	respiratory nitrate reductase subunit beta
ETAC_RS04545	-2.23237	3.14e-12	ETAC_04490	transporter
oppD	-2.60803	3.51e-12	NA	NA
ETAC_RS08285	2.0829	3.77e-12	ETAC_08250	TonB-dependent receptor
ETAC_RS05815	-2.0868	4.48e-12	ETAC_05780	hypothetical protein
ETAC_RS08945	3.24792	4.54e-12	ETAC_08925	hypothetical protein
ETAC_RS15145	-7.96954	4.74e-12	ETAC_15115	hypothetical protein
ETAC_RS12835	2.2894	5.26e-12	ETAC_12850	Attachment invasion locus protein
ETAC_RS07810	-2.32061	6.6e-12	ETAC_07765	glutathionine S-transferase
ETAC_RS02575	-3.89532	7.37e-12	ETAC_02520	sugar isomerase
ETAC_RS08725	2.29012	8.23e-12	ETAC_08695	diguanylate cyclase
ETAC_RS12010	-7.68721	8.85e-12	ETAC_12085	hypothetical protein
rrf	-4.14871	8.87e-12	NA	NA
ETAC_RS10135	-5.77457	8.97e-12	ETAC_10165	flagellar assembly protein H
ETAC_RS01295	-3.77925	9.16e-12	ETAC_01260	L-1,2-propanediol oxidoreductase
ETAC_RS04685	-3.33589	9.45e-12	ETAC_04635	aspartate aminotransferase
ETAC_RS13325	-2.34063	1.13e-11	ETAC_13335	iron ABC transporter substrate-binding protein
ETAC_RS03355	-3.08164	1.41e-11	ETAC_03285	PTS acetylgalactosamine transporter subunit IIC
ETAC_RS02355	-2.56104	1.44e-11	NA	NA
ETAC_RS05720	-2.00011	1.48e-11	ETAC_05670	C4-dicarboxylate ABC transporter
ETAC_RS10720	2.30985	1.57e-11	ETAC_10775	phosphoribosylformimino-5-aminoimidazole carboxamide ribotide isomerase
ETAC_RS03340	-3.82655	1.89e-11	ETAC_03270	DeoR family transcriptional regulator
ETAC_RS10385	-2.25741	2.14e-11	ETAC_10420	dimethyl sulfoxide reductase subunit A
ETAC_RS07325	-2.21393	2.37e-11	ETAC_07290	CysB family transcriptional regulator
ETAC_RS10855	-2.20199	2.54e-11	ETAC_10910	hypothetical protein
ETAC_RS15765	-4.3643	2.54e-11	ETAC_15700	PTS ascorbate transporter subunit IIC
ETAC_RS08110	-2.57042	3.29e-11	ETAC_08065	type III effector phosphothreonine lyase
ETAC_RS07265	2.13591	3.44e-11	ETAC_07230	membrane protein
fliL	-7.62765	4.28e-11	NA	NA
ETAC_RS05910	-4.03934	4.33e-11	ETAC_05865	flagellar rod assembly protein FlgJ
ETAC_RS04515	2.48341	5.22e-11	ETAC_04460	hypothetical protein
ETAC_RS02055	-3.83511	5.95e-11	ETAC_02015	pyruvate formate-lyase 3-activating protein
ETAC_RS16170	-2.93561	8.81e-11	ETAC_16110	ketodeoxygluconokinase
ETAC_RS14295	-3.01598	1.2e-10	ETAC_14250	hypothetical protein
ETAC_RS10120	-3.23565	1.3e-10	ETAC_10150	flagellar hook-basal body protein FliE
ETAC_RS12090	-5.57839	1.33e-10	ETAC_12165	anaerobic sulfatase maturase
ETAC_RS06530	-4.45704	1.58e-10	ETAC_06500	nickel transporter ATP-binding protein NikE
ETAC_RS08450	-5.12963	1.72e-10	ETAC_08420	phosphoribosylglycinamide formyltransferase 2
ETAC_RS15845	-2.20029	1.86e-10	ETAC_15780	glycogen debranching protein
ETAC_RS05865	-2.23658	2.19e-10	ETAC_05820	flagellar basal-body P-ring formation protein FlgA
ETAC_RS01525	-2.23947	3.27e-10	NA	NA
ETAC_RS17525	-3.05108	3.54e-10	NA	NA
ETAC_RS07145	-2.56357	3.88e-10	ETAC_07110	peptide ABC transporter ATP-binding protein
ETAC_RS05875	-7.34892	4.2e-10	ETAC_05830	flagellar basal body rod protein FlgC
ETAC_RS14360	-2.20149	4.66e-10	ETAC_14320	C4-dicarboxylate ABC transporter substrate-binding protein
ETAC_RS15735	2.0716	5.31e-10	ETAC_15670	hypothetical protein
fxsA	-4.68886	6.41e-10	NA	NA
ETAC_RS12130	-3.34704	6.69e-10	ETAC_12205	tagatose-bisphosphate aldolase
ETAC_RS09050	-3.14463	6.99e-10	ETAC_09030	sugar:proton symporter
ETAC_RS01290	-7.41418	7.71e-10	ETAC_01255	fuculose phosphate aldolase
ETAC_RS03815	-3.87048	7.99e-10	ETAC_03745	phosphoribosylformylglycinamidine synthase
ETAC_RS07920	-3.28899	8.44e-10	ETAC_07870	dithiobiotin synthetase
ETAC_RS01320	3.46152	8.57e-10	ETAC_01290	trimethylamine N-oxide reductase cytochrome C subunit
ETAC_RS06610	-2.05732	9.87e-10	ETAC_06580	4-diphosphocytidyl-2-C-methyl-D-erythritol kinase
ETAC_RS06430	-2.72402	1.08e-09	ETAC_06395	hypothetical protein
galM	-3.68911	1.11e-09	NA	NA
ETAC_RS02505	2.14214	1.13e-09	ETAC_02450	ABC transporter permease
ETAC_RS12105	-3.99134	1.23e-09	ETAC_12180	PTS fructose IIA component domain protein
ETAC_RS12125	-3.91122	1.75e-09	ETAC_12200	aldose isomerase
ETAC_RS04140	-3.81444	1.77e-09	ETAC_04085	hypothetical protein
ETAC_RS15065	3.25402	1.88e-09	ETAC_15035	hypothetical protein
ETAC_RS15920	-2.33324	2.04e-09	ETAC_15855	glycerate kinase
ETAC_RS12020	-2.34683	3.15e-09	ETAC_12095	hypothetical protein
ETAC_RS12080	-2.81254	3.34e-09	ETAC_12155	hypothetical protein
ETAC_RS12755	-6.68666	3.42e-09	ETAC_12770	formamidopyrimidine-DNA glycosylase
ETAC_RS07830	2.52851	4.58e-09	ETAC_07780	elongation factor G
ETAC_RS01100	-2.1977	4.67e-09	ETAC_01045	nitrate reductase
ETAC_RS14325	-2.09268	5.37e-09	ETAC_14280	DNA-binding protein
ETAC_RS11975	-2.62126	5.84e-09	ETAC_12050	glutamate synthase
ETAC_RS01675	2.06783	6.22e-09	ETAC_01635	iron-sulfur cluster repair di-iron protein
ETAC_RS15570	2.30025	6.55e-09	ETAC_15505	transporter
ETAC_RS10170	-6.8633	7.9e-09	ETAC_10200	flagellar biogenesis protein
ETAC_RS02605	-2.47642	1.02e-08	ETAC_02550	LysR family transcriptional regulator
ETAC_RS17270	2.00979	1.06e-08	NA	NA
ETAC_RS03205	2.77607	1.24e-08	ETAC_03135	nucleoside triphosphate hydrolase
ETAC_RS12100	-3.77155	1.46e-08	ETAC_12175	N-acetylglucosamine-6-phosphate deacetylase
ETAC_RS06545	-6.74677	1.8e-08	ETAC_06515	nickel transporter permease NikB
ETAC_RS09210	-3.23079	1.82e-08	ETAC_09195	acetoacetate metabolism regulatory protein AtoC
ETAC_RS13865	-2.66531	2.25e-08	ETAC_13815	methyl-accepting chemotaxis sensory transducer
ETAC_RS10025	-3.48934	2.91e-08	ETAC_10050	LysR family transcriptional regulator
ETAC_RS04495	-3.48783	3.44e-08	ETAC_04440	acetylneuraminate ABC transporter
ETAC_RS00155	2.7407	4.52e-08	ETAC_00155	hypothetical protein
ETAC_RS09200	-2.46273	4.64e-08	ETAC_09185	peptide transporter
ETAC_RS01890	-3.32388	6.79e-08	ETAC_01845	protease
ssrS	-3.10101	7.27e-08	NA	NA
ETAC_RS12120	-5.19525	7.44e-08	ETAC_12195	PTS N-acetylgalactosamine transporter subunit IIB
ETAC_RS04540	-2.80151	8.57e-08	ETAC_04485	hypothetical protein
ETAC_RS04500	-6.77933	8.82e-08	ETAC_04445	membrane protein
ETAC_RS14925	-2.05927	9.44e-08	ETAC_14895	aspartate carbamoyltransferase regulatory subunit
ETAC_RS11465	-4.8314	1.12e-07	ETAC_11520	type VI secretion protein
ETAC_RS11170	-2.57188	1.17e-07	ETAC_11225	NADH-quinone oxidoreductase subunit K
ETAC_RS04045	2.0572	1.27e-07	ETAC_03985	membrane protein
ETAC_RS05340	3.39357	1.51e-07	ETAC_05315	ferredoxin-type protein NapF
ETAC_RS12055	-3.53363	1.59e-07	ETAC_12130	chemotaxis protein
ETAC_RS15105	-3.62825	1.59e-07	ETAC_15075	guanine deaminase
ETAC_RS01010	4.71122	1.76e-07	ETAC_00955	[citrate [pro-3S]-lyase] ligase
ETAC_RS01310	4.45292	2.12e-07	ETAC_01280	chaperone protein TorD
ETAC_RS15110	-3.08647	2.58e-07	ETAC_15080	purine permease YgfO
ETAC_RS17400	-2.73588	2.88e-07	NA	NA
chiP	-4.4308	3.36e-07	NA	NA
ETAC_RS12070	-6.26204	3.93e-07	ETAC_12145	thiamine biogenesis protein ThiJ
ETAC_RS11980	-2.46984	4.82e-07	ETAC_12055	pyruvate-flavodoxin oxidoreductase
ETAC_RS02735	-2.08638	5.14e-07	ETAC_02680	methionine ABC transporter permease
ETAC_RS06290	-6.81665	5.15e-07	ETAC_06250	hypothetical protein
ETAC_RS04505	-3.54167	6.33e-07	ETAC_04450	N-acetylneuraminic acid mutarotase
ETAC_RS14420	2.24667	1e-06	ETAC_14380	hypothetical protein
ETAC_RS07910	-2.53689	1.09e-06	ETAC_07860	LysR family transcriptional regulator
ETAC_RS11355	-2.73318	1.18e-06	ETAC_11410	colicin V production protein
ETAC_RS10065	-6.38823	1.21e-06	ETAC_10095	flagella biosynthesis protein FliZ
ETAC_RS01285	-3.98098	1.48e-06	ETAC_01245	L-fucose permease
ETAC_RS12790	-2.53594	1.58e-06	ETAC_12805	electron transfer flavoprotein FixB
ETAC_RS08010	-2.90088	1.6e-06	ETAC_07965	hypothetical protein
ETAC_RS07940	-5.57727	2.06e-06	ETAC_07895	transcriptional antiterminator BglG1
ETAC_RS03225	-2.17397	3.28e-06	ETAC_03155	GMP reductase
ETAC_RS13335	-2.89404	3.3e-06	ETAC_13345	Ferric iron ABC transporter ATP-binding protein
ETAC_RS03350	-2.86059	4.27e-06	ETAC_03280	PTS N-acetylgalactosamine transporter subunit IIB
ETAC_RS12245	-4.22464	4.8e-06	ETAC_12320	galactose-1-phosphate uridylyltransferase
ETAC_RS10375	-2.50401	4.96e-06	ETAC_10410	dimethyl sulfoxide reductase subunit C
ETAC_RS11350	-2.05587	5.17e-06	ETAC_11405	amidophosphoribosyltransferase
ETAC_RS06855	-2.15414	5.67e-06	ETAC_06830	spermidine export protein MdtJ
ETAC_RS08705	-2.64986	7.76e-06	ETAC_08680	hypothetical protein
ETAC_RS16105	-2.51427	7.77e-06	ETAC_16045	phosphosugar isomerase/binding protein
ETAC_RS12065	-4.17972	8.86e-06	ETAC_12140	hypothetical protein
ETAC_RS06225	-3.42231	9.27e-06	NA	NA
ETAC_RS06435	-2.25563	9.35e-06	ETAC_06400	N-acyl-L-amino acid amidohydrolase
ETAC_RS14450	-2.89664	9.47e-06	ETAC_14415	rubredoxin
ETAC_RS10180	-5.83868	9.66e-06	ETAC_10210	flagellar biosynthesis protein FliQ
ETAC_RS04455	-5.96399	1.02e-05	ETAC_04400	aspartate racemase
ETAC_RS08005	-2.47931	1.23e-05	ETAC_07960	ArsR family transcriptional regulator
ETAC_RS14100	-3.97961	1.23e-05	ETAC_14055	hypothetical protein
ETAC_RS11950	-5.02295	1.28e-05	ETAC_12025	hypothetical protein
ETAC_RS16835	-3.62377	1.59e-05	ETAC_16750	5,10-methylenetetrahydrofolate reductase
ETAC_RS11635	-3.19011	1.63e-05	ETAC_11690	phage-related protein, tail component
ETAC_RS03615	-5.09673	1.67e-05	ETAC_03535	hypothetical protein
ETAC_RS14940	2.11986	1.79e-05	ETAC_14910	p-hydroxybenzoic acid efflux subunit AaeA
ETAC_RS09270	-5.20531	2.44e-05	ETAC_09260	hydrolase Cof family protein
ETAC_RS17855	-2.21638	2.49e-05	NA	NA
ETAC_RS05850	-5.32795	2.61e-05	ETAC_05805	flagellar biosynthesis protein FlhE
ETAC_RS05035	-2.89317	2.64e-05	ETAC_05000	ArsR family transcriptional regulator
ETAC_RS12190	-2.61733	2.96e-05	ETAC_12265	biotin synthase
ETAC_RS17345	-2.48872	3.1e-05	NA	NA
ETAC_RS01635	2.58152	3.51e-05	ETAC_01595	membrane protein
ETAC_RS06235	-2.1388	3.66e-05	ETAC_06190	hypothetical protein
ETAC_RS14885	-2.12985	4.58e-05	ETAC_14855	sn-glycerol-3-phosphate transporter
ETAC_RS15775	-2.60137	5.54e-05	ETAC_15710	PTS ascorbate transporter subunit IIA
ETAC_RS06130	-2.41132	6.42e-05	ETAC_06085	hypothetical protein
ETAC_RS14315	-2.25971	7.11e-05	ETAC_14270	D-galactose transporter GalP
ETAC_RS01830	-2.14004	7.54e-05	NA	NA
ETAC_RS14095	-3.3862	9.77e-05	ETAC_14050	hypothetical protein
ETAC_RS15785	-2.51149	9.88e-05	ETAC_15720	L-xylulose 5-phosphate 3-epimerase
ETAC_RS14890	-2.14711	0.000104532	ETAC_14860	glycerophosphodiester phosphodiesterase
ETAC_RS12785	-2.20239	0.000123341	ETAC_12800	antiporter
ETAC_RS14875	-2.67547	0.000125073	ETAC_14845	glycerol-3-phosphate dehydrogenase subunit B
ETAC_RS07385	-3.31324	0.000154625	NA	NA
ETAC_RS05220	-2.08033	0.000161888	ETAC_05195	uracil transporter
ETAC_RS11605	-2.60814	0.0001673	ETAC_11660	hypothetical protein
ETAC_RS14000	-3.32329	0.000178986	ETAC_13950	formate hydrogenlyase subunit 7
ETAC_RS17425	2.67073	0.00019643	NA	NA
ETAC_RS12240	-2.22541	0.00019726	ETAC_12315	UDP-galactose-4-epimerase
ETAC_RS14090	-2.75404	0.000256319	ETAC_14045	hypothetical protein
araD	-2.12122	0.00030797	NA	NA
ETAC_RS08025	-2.79462	0.000309961	ETAC_07980	Regulatory protein SoxS
ETAC_RS16765	-4.29242	0.000461664	ETAC_16680	hypothetical protein
ETAC_RS12180	-4.64032	0.000485887	ETAC_12255	malonyl-[acyl-carrier protein] O-methyltransferase BioC
ETAC_RS14945	4.07542	0.00049074	ETAC_14915	protein AaeX
ETAC_RS08815	-4.722	0.000517577	ETAC_08790	Ribulose-5-phosphate 4-epimerase
ETAC_RS09330	-2.31348	0.000625662	ETAC_09335	ImpA domain-containing protein
ETAC_RS14345	-3.16624	0.000677193	ETAC_14305	glycoside hydrolase
ETAC_RS03610	-5.19429	0.000762394	ETAC_03530	hypothetical protein
ETAC_RS05530	-5.21164	0.000763227	NA	NA
ETAC_RS07945	-2.58074	0.000934893	NA	NA
ETAC_RS15080	2.25134	0.000955109	ETAC_15050	murein hydrolase effector protein LrgB
ETAC_RS10635	-4.74148	0.000985696	ETAC_10690	pilus assembly protein FimA
ETAC_RS06655	-2.88531	0.00099421	NA	NA
ETAC_RS06440	-2.12687	0.00103315	ETAC_06405	C4-dicarboxylate ABC transporter
ETAC_RS10175	-3.86188	0.00115894	ETAC_10205	flagellar biosynthesis protein FliP
ETAC_RS14880	-3.16415	0.00156322	ETAC_14850	sn-glycerol-3-phosphate dehydrogenase subunit A
ETAC_RS01405	-3.97437	0.00177361	ETAC_01375	hypothetical protein
ETAC_RS00940	-3.28333	0.00179857	ETAC_00885	sugar ABC transporter ATP-binding protein
ETAC_RS13980	-3.08277	0.00180814	ETAC_13930	formate hydrogenlyase subunit 3
ETAC_RS05995	-3.30075	0.00203069	ETAC_05950	usher protein
ETAC_RS10380	-2.27778	0.00229543	ETAC_10415	dimethyl sulfoxide reductase subunit B
ETAC_RS14005	-3.78227	0.00343104	ETAC_13955	formate hydrogenlyase maturation protein HycH
ETAC_RS05270	-2.52507	0.00346348	ETAC_05245	phosphoribosylaminoimidazole-succinocarboxamide synthase
ETAC_RS02760	-2.34429	0.00363571	NA	NA
ETAC_RS02350	-2.43928	0.00383635	NA	NA
ETAC_RS06660	-2.01857	0.0043332	NA	NA
lamB	-2.33306	0.0043447	NA	NA
ETAC_RS04205	-3.0673	0.00464495	ETAC_04150	protein EsaB
ETAC_RS07720	2.4325	0.00468322	ETAC_07675	Bcr/CflA family drug resistance efflux transporter
ETAC_RS15135	-2.04166	0.00491653	ETAC_15105	hypothetical protein
ETAC_RS06125	-2.97723	0.00571374	NA	NA
ETAC_RS03230	-3.63682	0.00573855	ETAC_03160	type IV fimbrial assembly protein PilC
ETAC_RS17770	-4.5018	0.00728069	NA	NA
ETAC_RS08820	-2.917	0.00762965	ETAC_08795	hypothetical protein
ETAC_RS01410	-4.11146	0.00822293	ETAC_01380	hemolysin secretion protein D
ETAC_RS14485	-2.3283	0.00919785	ETAC_14465	putrescine transporter
ETAC_RS15685	-2.58154	0.00925607	ETAC_15620	thiosulfate reductase cytochrome B subunit
