# Supplementary material for: In vitro Edwardsiella piscicida CK108 Transcriptome Profiles with Subinhibitory Concentrations of Phenol and Formalin Reveal New Insights into Bacterial Pathogenesis Mechanisms
Source: Microorganisms. 2020 Jul 17;8(7):1068. doi: 10.3390/microorganisms8071068 (PMC7409036; doi:10.3390/microorganisms8071068)
Supplement: Supplementary file 1 [file microorganisms-08-01068-s001.zip › Suppl_Table S2_DEGs when formalin treated.xlsx]

## Sheet: Legend
Table S2. DEGs when formalin treated
Column name	Description
Locus	Gene identifier
log2FoldChange	Gene expression level compared to none-treated cells
padj	Adjusting p-values by Benjamini-Hochberg (BH) method
Old_locus	Old gene identifier
Protein_name	Annotation of the function

## Sheet: DEG list
Locus	log2FoldChange	padj	Old_locus	Protein_name
araD	-2.0418	0.000146485	NA	NA
artM	-2.58173	4.56e-12	NA	NA
artP	-5.03952	1.66e-44	NA	NA
cadB	3.6314	2.42e-16	NA	NA
cbiC	-2.21746	3.67e-14	NA	NA
emrB	2.28312	1.8e-64	NA	NA
ETAC_RS00030	2.00053	2.17e-79	ETAC_00030	hypothetical protein
ETAC_RS00040	-3.85173	7.75e-26	ETAC_00040	heat-shock protein IbpA
ETAC_RS00045	-3.28606	3.5e-09	ETAC_00045	heat-shock protein IbpB
ETAC_RS00120	-3.11823	2.76e-06	ETAC_00120	xanthine permease
ETAC_RS00155	2.55751	2.58e-07	ETAC_00155	hypothetical protein
ETAC_RS00250	2.54718	2.82e-19	NA	glycosyl transferase
ETAC_RS00270	-3.46179	5.91e-40	ETAC_00280	2-amino-3-ketobutyrate CoA ligase
ETAC_RS00275	-2.82164	1.4e-55	ETAC_00285	L-threonine 3-dehydrogenase
ETAC_RS00285	-2.33252	0.000384203	ETAC_00295	sugar transporter
ETAC_RS00350	2.24091	5.42e-13	ETAC_00360	transcription termination factor Rho
ETAC_RS00520	-3.76455	2.63e-36	ETAC_00510	acetolactate synthase
ETAC_RS00575	2.01231	2.84e-21	ETAC_00570	uridine phosphorylase
ETAC_RS00640	-2.14274	4.79e-24	ETAC_00635	(alpha)-aspartyl dipeptidase
ETAC_RS00685	-4.85944	9e-09	NA	NA
ETAC_RS00725	2.08523	4.85e-07	NA	NA
ETAC_RS00815	-2.00805	0.00119134	ETAC_00775	phosphoribosylamine--glycine ligase
ETAC_RS00845	-9.14342	4.7e-114	ETAC_00785	hypothetical protein
ETAC_RS00850	-8.79427	0	ETAC_00790	acetyl-CoA synthetase
ETAC_RS00910	2.66309	3.86e-164	ETAC_00855	glucose-6-phosphate isomerase
ETAC_RS00920	2.11225	2.35e-16	ETAC_00865	protein PsiE
ETAC_RS00955	-2.42299	3.88e-24	ETAC_00900	chorismate--pyruvate lyase
ETAC_RS00980	6.34624	8.73e-80	ETAC_00925	antiporter
ETAC_RS00985	6.05832	1.37e-36	ETAC_00930	2-(5''-triphosphoribosyl)-3'-dephosphocoenzyme-A synthase
ETAC_RS00990	6.75985	3.75e-90	ETAC_00935	2-(5''-triphosphoribosyl)-3'-dephospho-CoA synthase
ETAC_RS00995	7.93896	1.02e-45	ETAC_00940	citrate lyase subunit alpha
ETAC_RS01000	9.60636	3e-46	ETAC_00945	citrate lyase subunit beta
ETAC_RS01005	9.71757	2.66e-51	ETAC_00950	citrate lyase ACP
ETAC_RS01010	8.38241	3.5e-21	ETAC_00955	[citrate [pro-3S]-lyase] ligase
ETAC_RS01050	-2.8787	1.63e-21	ETAC_00995	phage-shock protein
ETAC_RS01055	-3.61937	4.05e-28	ETAC_01000	hypothetical protein
ETAC_RS01070	4.15662	0	ETAC_01015	aldehyde reductase
ETAC_RS01085	4.71902	1.13e-57	ETAC_01030	membrane protein
ETAC_RS01090	-3.72396	9.88e-243	ETAC_01035	superoxide dismutase
ETAC_RS01095	-3.00652	1.79e-31	ETAC_01040	nitrate reductase A subunit gamma
ETAC_RS01125	2.33799	9.48e-06	ETAC_01075	hypothetical protein
ETAC_RS01175	2.5207	8.24e-38	ETAC_01130	glutaminase
ETAC_RS01180	3.04218	2.9e-16	ETAC_01135	hypothetical protein
ETAC_RS01200	2.55325	1.24e-22	ETAC_01155	hypothetical protein
ETAC_RS01235	2.3537	4.94e-06	ETAC_01190	DNA-specific endonuclease I
ETAC_RS01265	-3.44315	8.91e-47	ETAC_01225	DNA-binding transcriptional activator FucR
ETAC_RS01280	-2.44726	1.8e-11	ETAC_01240	L-fucose isomerase
ETAC_RS01285	-3.38069	2.89e-10	ETAC_01245	L-fucose permease
ETAC_RS01290	-4.51528	4.92e-12	ETAC_01255	fuculose phosphate aldolase
ETAC_RS01295	-4.26533	2.93e-23	ETAC_01260	L-1,2-propanediol oxidoreductase
ETAC_RS01445	-4.8057	2.87e-77	ETAC_01420	hypothetical protein
ETAC_RS01450	-3.82991	2.67e-114	ETAC_01425	amino acid dehydrogenase
ETAC_RS01455	-3.81544	8.5e-30	ETAC_01430	hypothetical protein
ETAC_RS01460	-5.8434	6.04e-233	ETAC_01435	lactate permease
ETAC_RS01480	-2.13887	1.88e-08	ETAC_01455	fumarate reductase subunit D
ETAC_RS01525	-2.35272	6.36e-14	NA	NA
ETAC_RS01620	-2.45377	4.7e-17	ETAC_01580	membrane protein
ETAC_RS01635	-2.96758	2.19e-06	ETAC_01595	membrane protein
ETAC_RS01675	7.15069	1.78e-97	ETAC_01635	iron-sulfur cluster repair di-iron protein
ETAC_RS01710	-3.01118	7.97e-23	ETAC_01675	gamma-glutamylcyclotransferase
ETAC_RS01715	2.18728	1.79e-31	ETAC_01680	inorganic pyrophosphatase
ETAC_RS01740	-4.20157	2.5e-101	ETAC_01705	malate dehydrogenase
ETAC_RS01760	-2.34379	1.66e-07	ETAC_01725	50S ribosomal protein L27
ETAC_RS01830	-3.53291	8.85e-12	NA	NA
ETAC_RS01835	2.18746	4.65e-33	ETAC_01790	ribosome maturation protein RimP
ETAC_RS01855	2.98797	2.2e-30	ETAC_01810	tRNA pseudouridine synthase B
ETAC_RS01875	3.32099	4.99e-64	ETAC_01830	RNA helicase
ETAC_RS01880	3.68132	4.1e-23	ETAC_01835	membrane protein
ETAC_RS01885	3.21326	5.55e-30	ETAC_01840	membrane protein
ETAC_RS01890	-2.58318	4.87e-07	ETAC_01845	protease
ETAC_RS01905	-2.84034	3.5e-14	ETAC_01860	N-acetyltransferase
ETAC_RS01950	2.26167	6.39e-12	ETAC_01910	EnvZ/OmpR regulon moderator
ETAC_RS01955	2.1079	1.31e-30	ETAC_01915	membrane protein
ETAC_RS01995	-2.63722	1.43e-05	ETAC_01955	hypothetical protein
ETAC_RS02000	-2.11593	1.43e-22	ETAC_01960	serine/threonine protein kinase
ETAC_RS02055	-2.19471	3.67e-07	ETAC_02015	pyruvate formate-lyase 3-activating protein
ETAC_RS02060	-2.4851	3.42e-18	ETAC_02020	fructose-6-phosphate aldolase
ETAC_RS02340	-2.50552	1.35e-14	ETAC_02300	zinc transporter ZupT
ETAC_RS02345	-2.27735	1.17e-12	ETAC_02305	hypothetical protein
ETAC_RS02355	-4.14316	1.48e-28	NA	NA
ETAC_RS02410	2.03884	4.85e-06	ETAC_02355	deoxyribose-phosphate aldolase
ETAC_RS02415	2.14721	2.16e-28	ETAC_02360	thymidine phosphorylase
ETAC_RS02425	2.03157	3.85e-20	ETAC_02370	purine nucleoside phosphorylase
ETAC_RS02430	-4.40957	8.09e-85	ETAC_02375	cytochrome B562
ETAC_RS02435	-4.33918	7.12e-65	ETAC_02380	nickel-dependent hydrogenase cytochrome b-type subunit
ETAC_RS02460	-2.1065	1.24e-22	ETAC_02405	ribosome hibernation promoting factor HPF
ETAC_RS02525	2.60464	2.51e-13	ETAC_02470	hypothetical protein
ETAC_RS02570	2.18659	3.72e-41	ETAC_02515	peptidase
ETAC_RS02575	-4.37281	9.66e-17	ETAC_02520	sugar isomerase
ETAC_RS02580	-2.17606	9.71e-07	ETAC_02525	N-acetylmannosamine kinase
ETAC_RS02590	-2.08749	3.15e-13	ETAC_02535	disulfide oxidoreductase
ETAC_RS02595	-2.75346	1.94e-11	ETAC_02540	thiol:disulfide interchange protein
ETAC_RS02600	-2.65527	8.86e-25	ETAC_02545	arylsulfate sulfotransferase
ETAC_RS02605	-3.69147	2.43e-21	ETAC_02550	LysR family transcriptional regulator
ETAC_RS02685	-2.57094	6.06e-21	ETAC_02630	murein transglycosylase
ETAC_RS02760	-4.88977	3.63e-10	NA	NA
ETAC_RS02780	-2.80959	4.5e-78	ETAC_02705	protein acetyltransferase
ETAC_RS02785	2.05441	1.24e-14	ETAC_02710	hypothetical protein
ETAC_RS02915	-2.0646	4.43e-14	ETAC_02840	kinase inhibitor
ETAC_RS02920	-3.97915	1.18e-14	ETAC_02845	xanthine dehydrogenase subunit XdhC
ETAC_RS02925	-3.55	1.71e-12	ETAC_02850	xanthine dehydrogenase subunit XdhB
ETAC_RS02930	-2.90988	4.63e-10	ETAC_02855	xanthine dehydrogenase subunit XdhA
ETAC_RS03045	-3.46637	6.77e-14	ETAC_02970	ABC transporter
ETAC_RS03050	-4.18617	6.38e-13	ETAC_02975	iron-hydroxamate ABC transporter substrate-binding protein
ETAC_RS03060	-2.60746	1.71e-21	ETAC_02990	ferrichrome-iron receptor
ETAC_RS03090	-2.21273	2.59e-41	ETAC_03020	long-chain fatty acid--CoA ligase
ETAC_RS03095	-2.34646	1.4e-35	ETAC_03025	acetolactate synthase large subunit
ETAC_RS03200	2.50938	1.01e-36	ETAC_03130	preprotein translocase subunit SecA
ETAC_RS03230	-2.62798	0.0016174	ETAC_03160	type IV fimbrial assembly protein PilC
ETAC_RS03285	-2.35984	7.07e-99	ETAC_03215	bifunctional aconitate hydratase 2/2-methylisocitrate dehydratase
ETAC_RS03290	-2.23995	3.36e-29	ETAC_03220	hypothetical protein
ETAC_RS03295	-2.04125	1.77e-33	ETAC_03225	hypothetical protein
ETAC_RS03325	2.00296	8.32e-35	ETAC_03255	multidrug ABC transporter ATP-binding protein
ETAC_RS03330	2.00853	2.25e-26	ETAC_03260	inner membrane transport permease
ETAC_RS03335	2.55447	7.23e-32	ETAC_03265	PTS IIA component YadI
ETAC_RS03350	-2.98359	1.53e-08	ETAC_03280	PTS N-acetylgalactosamine transporter subunit IIB
ETAC_RS03355	-2.5568	9.43e-11	ETAC_03285	PTS acetylgalactosamine transporter subunit IIC
ETAC_RS03360	-2.1131	4.4e-13	ETAC_03290	PTS N-acetylgalactosamine transporter subunit IID
ETAC_RS03375	2.11927	2.73e-12	ETAC_03310	aspartate alpha-decarboxylase
ETAC_RS03430	-3.7588	2.08e-10	ETAC_03365	outer membrane protein S1
ETAC_RS03465	-2.89941	4.55e-08	ETAC_03400	Prepilin peptidase dependent protein A
ETAC_RS03530	-2.45429	4.04e-36	ETAC_03450	murein transglycosylase
ETAC_RS03595	3.85023	2.7e-60	ETAC_03515	flavodoxin
ETAC_RS03600	-4.20798	1.34e-88	ETAC_03520	hypothetical protein
ETAC_RS03610	-4.14658	0.000762466	ETAC_03530	hypothetical protein
ETAC_RS03615	-3.97977	2.93e-10	ETAC_03535	hypothetical protein
ETAC_RS03635	2.66723	4.39e-34	ETAC_03560	30S ribosomal protein S2
ETAC_RS03640	3.02718	2.71e-17	ETAC_03565	elongation factor Ts
ETAC_RS03740	2.64173	4.55e-10	ETAC_03670	peptide permease
ETAC_RS03750	-2.43512	7.63e-16	ETAC_03680	cytochrome C554
ETAC_RS03865	-2.16243	0.00550696	ETAC_03795	glutamate/gamma-aminobutyrate antiporter
ETAC_RS03870	-2.57858	0.000646955	ETAC_03800	amino acid transporter
ETAC_RS03880	2.43283	4.23e-11	ETAC_03810	DNA polymerase IV
ETAC_RS04015	2.70884	2.36e-31	ETAC_03955	3-oxoacyl-ACP synthase
ETAC_RS04020	3.15101	3.53e-18	ETAC_03960	3-ketoacyl-ACP reductase
ETAC_RS04025	2.18188	0.000169018	ETAC_03965	3-hydroxydecanoyl-ACP dehydratase
ETAC_RS04035	2.53817	8.02e-13	ETAC_03975	hypothetical protein
ETAC_RS04040	2.54869	1.32e-27	ETAC_03980	membrane protein
ETAC_RS04045	2.36916	2.78e-10	ETAC_03985	membrane protein
ETAC_RS04050	2.26244	7.4e-08	ETAC_03990	hypothetical protein
ETAC_RS04055	2.16362	1.98e-16	ETAC_03995	acyltransferase
ETAC_RS04065	2.41509	2.63e-32	ETAC_04005	acyl-CoA synthetase AMP-fatty acid ligase
ETAC_RS04085	2.35528	4.64e-37	ETAC_04025	1-acyl-sn-glycerol-3-phosphate acyltransferase
ETAC_RS04105	-4.67565	7.13e-46	ETAC_04045	tryptophan permease
ETAC_RS04110	-5.27573	4.03e-58	ETAC_04050	tryptophanase
ETAC_RS04130	2.67119	1.9e-34	ETAC_04075	cytochrome B561
ETAC_RS04135	2.56745	2.02e-28	ETAC_04080	oxidoreductase molybdopterin-binding protein
ETAC_RS04145	3.52851	2.31e-52	ETAC_04090	guanine deaminase
ETAC_RS04150	4.43524	1.43e-34	ETAC_04095	type III secretion apparatus
ETAC_RS04155	3.56044	2.32e-32	ETAC_04100	protein EsaK
ETAC_RS04160	2.3047	2.61e-16	ETAC_04105	hypothetical protein
ETAC_RS04165	3.1342	1.09e-48	ETAC_04110	type III secretion protein
ETAC_RS04170	3.06642	9.08e-06	ETAC_04115	type III secretion protein
ETAC_RS04175	2.51531	0.00128005	ETAC_04120	type III secretion protein
ETAC_RS04180	2.89787	0.00428532	ETAC_04125	type III secretion system needle protein SsaG
ETAC_RS04185	5.57423	1.43e-46	ETAC_04130	transcriptional regulator
ETAC_RS04190	3.41307	2.38e-12	ETAC_04135	hypothetical protein
ETAC_RS04195	3.52533	3.68e-21	ETAC_04140	protein EsaD
ETAC_RS04200	2.2818	9.87e-06	ETAC_04145	type II secretory pathway protein
ETAC_RS04210	3.21348	1.1e-23	ETAC_04155	hypothetical protein
ETAC_RS04215	2.96927	4.1e-29	ETAC_04160	protein EscB
ETAC_RS04220	2.54214	7.75e-13	ETAC_04165	type III secretion protein
ETAC_RS04225	2.84204	1.26e-18	ETAC_04170	protein EseD
ETAC_RS04230	2.46437	2.41e-13	ETAC_04175	type III secretion protein
ETAC_RS04240	2.73762	9.05e-16	ETAC_04185	secretion protein EspA
ETAC_RS04245	3.44229	7.44e-20	ETAC_04190	hypothetical protein
ETAC_RS04250	2.83873	7.2e-24	ETAC_04195	protein EsaQ
ETAC_RS04255	2.27903	8.47e-10	ETAC_04200	protein EsaP
ETAC_RS04260	4.60515	3.96e-05	ETAC_04205	type III secretion system ATPase
ETAC_RS04265	3.47537	5.72e-28	ETAC_04210	type III secretion system ATPase
ETAC_RS04270	3.6439	2.1e-13	ETAC_04215	secretion system apparatus protein SsaV
ETAC_RS04275	4.02457	8.13e-10	ETAC_04220	type III secretion protein
ETAC_RS04280	3.33969	7.55e-22	ETAC_04225	flagellar biosynthesis protein FliP
ETAC_RS04290	2.602	0.000278547	ETAC_04235	type III secretion protein
ETAC_RS04315	3.4494	9.4e-109	ETAC_04260	hypothetical protein
ETAC_RS04330	-2.63352	1.08e-11	ETAC_04275	threonine dehydratase
ETAC_RS04340	-2.63488	5.24e-16	ETAC_04285	propionate kinase
ETAC_RS04365	3.94344	3.92e-38	ETAC_04310	conjugal transfer surface exclusion protein TraT
ETAC_RS04395	-2.42251	6.21e-13	ETAC_04340	TonB-dependent receptor
ETAC_RS04400	-4.3643	3.03e-36	ETAC_04345	hemolysin activation protein
ETAC_RS04405	-4.97257	1.39e-76	ETAC_04350	hemolysin
ETAC_RS04410	-3.92755	5.34e-24	ETAC_04355	D-alanyl-D-alanine carboxypeptidase
ETAC_RS04415	-3.23219	6.52e-40	ETAC_04360	formate acetyltransferase 2
ETAC_RS04420	-3.74194	4.49e-32	ETAC_04365	pyruvate formate-lyase activating enzyme
ETAC_RS04450	-4.15738	3.75e-18	ETAC_04395	C4-dicarboxylate ABC transporter
ETAC_RS04455	-6.95936	1.11e-10	ETAC_04400	aspartate racemase
ETAC_RS04465	-6.2235	3.11e-119	ETAC_04410	hypothetical protein
ETAC_RS04470	-6.03993	2.42e-30	ETAC_04415	ABC transporter
ETAC_RS04475	-5.77508	6.75e-54	ETAC_04420	iron ABC transporter ATP-binding protein
ETAC_RS04480	-3.80162	1.35e-34	ETAC_04425	hypothetical protein
ETAC_RS04495	-2.94845	1.52e-06	ETAC_04440	acetylneuraminate ABC transporter
ETAC_RS04505	-2.09094	0.000225165	ETAC_04450	N-acetylneuraminic acid mutarotase
ETAC_RS04510	-5.01677	5.46e-11	ETAC_04455	membrane protein
ETAC_RS04535	2.2464	1.97e-21	ETAC_04480	hypothetical protein
ETAC_RS04540	-2.65449	1.87e-08	ETAC_04485	hypothetical protein
ETAC_RS04545	-2.03805	1.18e-12	ETAC_04490	transporter
ETAC_RS04580	2.51535	1.19e-36	ETAC_04525	branched-chain amino acid ABC transporter substrate-binding protein
ETAC_RS04685	-3.5663	1.73e-14	ETAC_04635	aspartate aminotransferase
ETAC_RS04830	-4.20062	0.00100176	ETAC_04785	nitrogen regulatory protein P-II 1
ETAC_RS04835	-3.10623	7.78e-10	ETAC_04790	ammonium transporter
ETAC_RS04945	-2.73301	1.87e-25	ETAC_04905	type-1 fimbrial protein subunit
ETAC_RS04960	-2.0569	1.37e-08	ETAC_04920	hypothetical protein
ETAC_RS05005	-3.39189	9.48e-43	ETAC_04965	protease
ETAC_RS05010	-2.49399	2.42e-08	ETAC_04970	hypothetical protein
ETAC_RS05030	-4.41079	6.64e-250	ETAC_04995	lactate dehydrogenase
ETAC_RS05035	-2.24428	0.000899836	ETAC_05000	ArsR family transcriptional regulator
ETAC_RS05045	-3.06719	4.96e-27	ETAC_05010	transcriptional regulator
ETAC_RS05050	-2.13958	0.000679552	ETAC_05015	MmgE/PrpD family protein
ETAC_RS05210	-2.09784	0.00285738	ETAC_05185	phosphoribosylformylglycinamidine cyclo-ligase
ETAC_RS05225	-2.6014	1.56e-26	ETAC_05200	GntR family transcriptional regulator
ETAC_RS05280	-2.88965	0.00113614	ETAC_05255	glycerol transporter
ETAC_RS05340	4.58944	2.69e-13	ETAC_05315	ferredoxin-type protein NapF
ETAC_RS05345	6.77826	1.7e-06	ETAC_05320	nitrate reductase subunit NapD
ETAC_RS05350	5.59844	2.51e-113	ETAC_05325	nitrate reductase catalytic subunit
ETAC_RS05355	4.35336	2.24e-38	ETAC_05330	ferredoxin-type protein NapG
ETAC_RS05360	5.66454	2.12e-24	ETAC_05335	quinol dehydrogenase membrane component
ETAC_RS05370	6.08204	2.66e-31	ETAC_05345	cytochrome C protein NapC
ETAC_RS05415	-4.76084	3.06e-283	ETAC_05390	malic enzyme
ETAC_RS05420	-4.32514	3.31e-50	ETAC_05395	hypothetical protein
ETAC_RS05445	-2.00249	7.15e-17	ETAC_05420	RpoE-regulated lipoprotein
ETAC_RS05465	2.50575	2.4e-62	ETAC_05440	PTS sugar transporter
ETAC_RS05470	3.6548	2.16e-151	ETAC_05445	cysteine synthase A
ETAC_RS05515	-2.67164	4.57e-08	NA	NA
ETAC_RS05525	-3.88846	0.00458639	NA	NA
ETAC_RS05530	-6.76806	4.99e-06	NA	NA
ETAC_RS05535	2.43654	1.01e-33	ETAC_05480	nucleoside permease
ETAC_RS05540	-2.13848	3.6e-21	ETAC_05485	manganese transporter
ETAC_RS05545	4.09353	1.1e-86	ETAC_05490	hypothetical protein
ETAC_RS05615	-2.2023	2.66e-37	ETAC_05560	malate dehydrogenase
ETAC_RS05620	4.00815	5.66e-65	ETAC_05565	cytidine deaminase
ETAC_RS05630	2.01446	7.14e-16	ETAC_05575	hypothetical protein
ETAC_RS05780	2.2883	1.96e-10	ETAC_05760	polysaccharide biosynthesis protein
ETAC_RS05825	-7.09404	0.00033433	NA	NA
ETAC_RS05830	-3.34639	1.03e-44	ETAC_05785	DgsA anti-repressor MtfA
ETAC_RS05835	2.08776	1.65e-08	ETAC_05790	hypothetical protein
ETAC_RS05840	-3.05418	1.08e-15	ETAC_05795	flagellar biosynthesis protein FlhB
ETAC_RS05845	-3.0529	7.32e-13	ETAC_05800	flagellar biosynthesis protein FlhA
ETAC_RS05850	-2.54009	0.000559755	ETAC_05805	flagellar biosynthesis protein FlhE
ETAC_RS05855	-5.06438	8.86e-21	ETAC_05810	flagella synthesis protein
ETAC_RS05860	-5.45289	1.75e-28	ETAC_05815	flagellar biosynthesis protein FlgM
ETAC_RS05865	-2.12444	1.5e-10	ETAC_05820	flagellar basal-body P-ring formation protein FlgA
ETAC_RS05870	-2.29886	1.27e-09	ETAC_05825	flagellar biosynthesis protein FlgB
ETAC_RS05875	-3.19491	1.2e-08	ETAC_05830	flagellar basal body rod protein FlgC
ETAC_RS05895	-2.5955	1.78e-08	ETAC_05850	flagellar basal body rod protein FlgG
ETAC_RS05900	-2.01408	1.37e-05	ETAC_05855	flagellar basal body L-ring protein
ETAC_RS05915	-3.41904	3e-13	ETAC_05870	flagellar hook protein FlgK
ETAC_RS05925	2.64187	6.95e-41	ETAC_05880	aspartate/tyrosine/aromatic aminotransferase
ETAC_RS05960	-2.02864	1.47e-09	ETAC_05915	sialidase
ETAC_RS05975	-4.44114	1.66e-61	ETAC_05930	hypothetical protein
ETAC_RS05990	-2.27161	4.08e-13	ETAC_05945	pilin protein
ETAC_RS05995	-3.80239	4.63e-05	ETAC_05950	usher protein
ETAC_RS06040	3.38201	1.1e-130	ETAC_06000	3-hydroxydecanoyl-ACP dehydratase
ETAC_RS06060	3.07453	1.62e-15	ETAC_06020	cell division protein
ETAC_RS06065	-2.1962	1.36e-21	ETAC_06025	DNA transformation protein TfoX
ETAC_RS06105	2.26904	1.88e-28	ETAC_06065	23S rRNA methyltransferase
ETAC_RS06125	-3.31508	7.42e-05	NA	NA
ETAC_RS06130	-3.41069	7.23e-09	ETAC_06085	hypothetical protein
ETAC_RS06140	-2.18135	0.00310861	ETAC_06100	glyoxalase
ETAC_RS06155	-2.62405	4.72e-12	ETAC_06115	phospholipase D
ETAC_RS06220	-2.96552	3.28e-20	ETAC_06185	hypothetical protein
ETAC_RS06225	-4.50924	4.5e-12	NA	NA
ETAC_RS06270	-4.23607	7.62e-71	ETAC_06230	transcriptional regulator
ETAC_RS06275	-4.45489	1.29e-145	ETAC_06235	two-component system sensor histidine kinase
ETAC_RS06280	-4.52332	7.52e-92	ETAC_06240	ABC transporter substrate-binding protein
ETAC_RS06285	-10.5578	4.81e-212	ETAC_06245	phosphoglycerate transporter
ETAC_RS06290	-11.8764	3.88e-14	ETAC_06250	hypothetical protein
ETAC_RS06295	-3.008	1.69e-32	ETAC_06255	hydrolase
ETAC_RS06315	-5.54782	1.55e-180	ETAC_06275	Ferric iron ABC transporter permease
ETAC_RS06320	-7.22332	0	ETAC_06280	iron ABC transporter substrate-binding protein
ETAC_RS06325	-7.94276	8.24e-89	ETAC_06285	MFS transporter
ETAC_RS06330	-3.30571	7.71e-42	ETAC_06290	Sensor histidine protein kinase UhpB, glucose-6-phosphate specific
ETAC_RS06335	-2.70867	1.42e-36	ETAC_06295	transcriptional regulator
ETAC_RS06355	-2.01872	4.65e-10	ETAC_06320	flagellar transcriptional regulator FlhD
ETAC_RS06360	-2.34821	4.99e-15	ETAC_06325	AraC family transcriptional regulator
ETAC_RS06365	-3.48063	8.57e-17	ETAC_06330	flagellar motor protein MotA
ETAC_RS06375	-2.65588	6.05e-12	ETAC_06340	chemotaxis protein CheA
ETAC_RS06380	-2.00359	1.56e-07	ETAC_06345	purine-binding chemotaxis protein
ETAC_RS06385	-2.70974	3.83e-10	ETAC_06350	methyl-accepting chemotaxis protein I
ETAC_RS06390	-3.57744	6.76e-25	ETAC_06355	methyl-accepting chemotaxis protein
ETAC_RS06395	-4.2706	8.71e-26	ETAC_06360	chemotaxis protein CheR
ETAC_RS06400	-3.09528	2.13e-32	ETAC_06365	two-component system protein-glutamate methylesterase response regulator
ETAC_RS06430	-2.8252	1.13e-11	ETAC_06395	hypothetical protein
ETAC_RS06445	-2.56344	1.02e-20	ETAC_06410	transcriptional regulator
ETAC_RS06450	-3.46425	3.79e-20	ETAC_06415	hypothetical protein
ETAC_RS06465	3.20826	2.96e-13	ETAC_06430	citrate carrier protein
ETAC_RS06480	-2.93618	1.61e-29	ETAC_06445	LysR family transcriptional regulator
ETAC_RS06495	3.77504	3.4e-28	ETAC_06460	hypothetical protein
ETAC_RS06500	6.56304	1.09e-163	NA	catalase
ETAC_RS06530	-3.87247	4.72e-12	ETAC_06500	nickel transporter ATP-binding protein NikE
ETAC_RS06535	-4.41012	8.11e-25	ETAC_06505	nickel transporter ATP-binding protein NikD
ETAC_RS06540	-3.89464	1.49e-31	ETAC_06510	nickel transporter permease NikC
ETAC_RS06545	-5.02776	1.59e-12	ETAC_06515	nickel transporter permease NikB
ETAC_RS06550	-3.97105	1.31e-41	ETAC_06520	nickel ABC transporter substrate-binding protein
ETAC_RS06595	-5.46482	5.09e-59	ETAC_06565	membrane protein
ETAC_RS06620	-2.59025	3.25e-51	ETAC_06590	glutamyl-tRNA reductase
ETAC_RS06625	-2.27887	7.35e-38	ETAC_06595	peptide chain release factor 1
ETAC_RS06630	-3.39047	6.47e-25	ETAC_06600	hypothetical protein
ETAC_RS06655	-4.18162	3.44e-08	NA	NA
ETAC_RS06660	-4.84404	1.79e-11	NA	NA
ETAC_RS06680	-2.02342	1.15e-17	ETAC_06645	diguanylate cyclase
ETAC_RS06695	2.98089	4.35e-40	ETAC_06665	lipoprotein
ETAC_RS06830	2.0753	4.09e-21	ETAC_06805	transcriptional regulator
ETAC_RS06835	2.10994	3.49e-34	ETAC_06810	glucose-6-phosphate 1-dehydrogenase
ETAC_RS06850	2.12767	6.45e-20	ETAC_06825	ketohydroxyglutarate aldolase
ETAC_RS06880	-2.18249	4.25e-15	ETAC_06855	membrane protein
ETAC_RS06915	-2.86267	6.59e-58	ETAC_06890	hypothetical protein
ETAC_RS06940	-2.93403	2.47e-22	ETAC_06915	hypothetical protein
ETAC_RS06985	3.56281	1.29e-54	ETAC_06960	MltA-interacting protein MipA
ETAC_RS06990	-2.7162	1.75e-13	ETAC_06965	transferrin-binding protein A
ETAC_RS07005	-3.07567	5.75e-07	ETAC_06980	hypothetical protein
ETAC_RS07010	-4.56742	1.6e-87	ETAC_06985	methionine sulfoxide reductase B
ETAC_RS07015	-5.31572	1.77e-146	ETAC_06990	hypothetical protein
ETAC_RS07060	2.5048	8.85e-21	ETAC_07035	pyrimidine (deoxy)nucleoside triphosphate pyrophosphohydrolase
ETAC_RS07065	2.45333	1.63e-63	ETAC_07040	exodeoxyribonuclease III
ETAC_RS07100	2.2464	3.51e-36	ETAC_07065	UTP--glucose-1-phosphate uridylyltransferase
ETAC_RS07125	-3.70318	1.59e-64	ETAC_07090	peptide ABC transporter substrate-binding protein
ETAC_RS07135	-2.06222	1.44e-15	ETAC_07100	peptide ABC transporter permease
ETAC_RS07145	-2.70527	3.02e-15	ETAC_07110	peptide ABC transporter ATP-binding protein
ETAC_RS07160	-2.04164	2.42e-23	ETAC_07125	ferroxidase
ETAC_RS07200	-8.61274	1.82e-122	ETAC_07165	outer membrane protein W
ETAC_RS07210	-4.58735	1.34e-23	ETAC_07175	tryptophan synthase subunit alpha
ETAC_RS07215	-4.73216	8.83e-28	ETAC_07180	tryptophan synthase subunit beta
ETAC_RS07220	-5.19062	6.56e-28	ETAC_07185	bifunctional indole-3-glycerol phosphate synthase/phosphoribosylanthranilate isomerase
ETAC_RS07225	-4.85099	2.28e-17	ETAC_07190	anthranilate phosphoribosyltransferase
ETAC_RS07230	-4.71229	1.54e-19	ETAC_07195	Anthranilate synthase amidotransferase component TrpAb
ETAC_RS07235	-4.77102	1.32e-27	ETAC_07200	anthranilate synthase component I
ETAC_RS07255	8.90431	1.19e-162	ETAC_07220	amino acid ABC transporter permease
ETAC_RS07260	9.5038	0	ETAC_07225	amino acid ABC transporter substrate-binding protein
ETAC_RS07280	-2.08333	1.81e-05	ETAC_07245	hypothetical protein
ETAC_RS07360	-2.54458	7.46e-15	ETAC_07325	hypothetical protein
ETAC_RS07370	-2.33409	3.5e-28	ETAC_07340	hypothetical protein
ETAC_RS07385	-2.71142	6.08e-06	NA	NA
ETAC_RS07410	3.78517	5.25e-116	ETAC_07365	proton/sodium-glutamate symport protein
ETAC_RS07415	2.0856	4.97e-19	ETAC_07370	membrane protein
ETAC_RS07430	-2.36061	2.13e-27	ETAC_07385	Fructosamine kinase
ETAC_RS07445	2.69621	1.18e-21	ETAC_07400	serine transporter
ETAC_RS07475	-2.90258	4.44e-09	ETAC_07430	membrane protein
ETAC_RS07495	4.82682	1.78e-45	ETAC_07455	hypothetical protein
ETAC_RS07570	-3.33854	1.79e-26	ETAC_07530	tetrathionate reductase subunit C
ETAC_RS07575	-2.66041	8.76e-50	ETAC_07535	tetrathionate reductase subunit A
ETAC_RS07675	-6.81319	3.52e-194	ETAC_07635	proline:sodium symporter
ETAC_RS07820	-2.62456	6.22e-18	NA	hypothetical protein
ETAC_RS07825	2.62923	2.05e-49	ETAC_07775	endonuclease III
ETAC_RS07830	3.41621	2.31e-16	ETAC_07780	elongation factor G
ETAC_RS07835	2.08086	2.03e-09	ETAC_07785	electron transport complex protein RsxA
ETAC_RS07840	3.13499	6.4e-71	ETAC_07790	electron transporter RnfG
ETAC_RS07845	2.85383	1.31e-37	ETAC_07795	electron transport complex protein
ETAC_RS07850	3.12084	1.96e-34	ETAC_07800	electron transporter RnfB
ETAC_RS07880	4.29869	1.25e-26	ETAC_07830	adenosine deaminase
ETAC_RS07885	2.27835	1.15e-47	ETAC_07835	GTP-binding protein
ETAC_RS07895	-2.52919	2.34e-71	ETAC_07845	fumarate hydratase
ETAC_RS07910	-3.05557	1.44e-09	ETAC_07860	LysR family transcriptional regulator
ETAC_RS07925	-2.52216	2.86e-09	ETAC_07875	hypothetical protein
ETAC_RS07965	2.34485	6.59e-10	ETAC_07920	membrane protein
ETAC_RS07970	2.12406	7.16e-21	ETAC_07925	hypothetical protein
ETAC_RS07980	2.70081	2.5e-15	ETAC_07935	chain length determinant protein WzzB
ETAC_RS07990	-2.2917	1.55e-19	ETAC_07945	universal stress protein UspA
ETAC_RS08010	-2.20239	1.86e-06	ETAC_07965	hypothetical protein
ETAC_RS08015	-2.70348	4.21e-15	ETAC_07970	membrane protein
ETAC_RS08020	-3.53135	1.46e-18	ETAC_07975	methyl-accepting chemotaxis protein
ETAC_RS08025	-2.40561	0.00104964	ETAC_07980	Regulatory protein SoxS
ETAC_RS08035	-4.45188	4.56e-23	ETAC_07990	sulfite reductase subunit C
ETAC_RS08040	-4.83603	2.58e-16	ETAC_07995	sulfite reductase subunit beta
ETAC_RS08045	-3.98404	4.31e-22	ETAC_08000	sulfite reductase subunit alpha
ETAC_RS08085	3.16899	6.3e-23	NA	hypothetical protein
ETAC_RS08110	5.8057	7.7e-74	ETAC_08065	type III effector phosphothreonine lyase
ETAC_RS08120	-2.91484	1.16e-48	ETAC_08070	glucose-1-phosphatase/inositol phosphatase
ETAC_RS08205	-3.23573	3.08e-32	ETAC_08165	Ethidium bromide-methyl viologen resistance protein EmrE
ETAC_RS08215	-3.79387	2.42e-31	ETAC_08175	oxidoreductase Fe-S-binding subunit
ETAC_RS08250	-5.37929	4.59e-222	ETAC_08210	phosphoenolpyruvate synthase
ETAC_RS08265	-3.68779	7.83e-22	ETAC_08230	heme utilization radical SAM enzyme HutW
ETAC_RS08270	-5.70997	1.53e-11	ETAC_08235	heme utilization carrier protein
ETAC_RS08275	-4.23226	1.98e-21	ETAC_08240	flavin reductase
ETAC_RS08305	-2.30325	0.000878034	ETAC_08270	hemin ABC transporter ATP-binding protein
ETAC_RS08355	2.09075	2.88e-22	ETAC_08320	phenylalanine--tRNA ligase subunit alpha
ETAC_RS08380	-2.23188	5.36e-49	ETAC_08345	choline/carnitine/betaine transporter
ETAC_RS08405	-2.05753	2.32e-25	ETAC_08370	hypothetical protein
ETAC_RS08410	3.15535	8.86e-25	ETAC_08380	porin
ETAC_RS08435	2.11509	2e-12	ETAC_08405	hypothetical protein
ETAC_RS08450	-2.66984	0.00100176	ETAC_08420	phosphoribosylglycinamide formyltransferase 2
ETAC_RS08475	-4.12068	8.32e-35	ETAC_08445	thiosulfate reductase cytochrome B subunit
ETAC_RS08480	-3.01045	4.17e-16	ETAC_08450	polysulfide reductase subunit B
ETAC_RS08485	-2.24778	5.56e-53	ETAC_08455	thiosulfate reductase PhsA
ETAC_RS08505	3.50849	9.2e-40	ETAC_08480	pyruvate kinase
ETAC_RS08525	-2.83193	5.91e-55	ETAC_08500	lipid hydroperoxide peroxidase
ETAC_RS08555	-3.38468	7.63e-14	ETAC_08530	transcriptional regulator
ETAC_RS08560	-3.41627	8.43e-10	ETAC_08535	phage-shock protein
ETAC_RS08565	-3.27929	1.71e-84	ETAC_08540	phage-shock protein
ETAC_RS08600	2.16249	2.25e-11	ETAC_08575	hypothetical protein
ETAC_RS08620	2.86125	2.24e-45	ETAC_08595	NADPH quinone reductase MdaB
ETAC_RS08625	-2.28818	3.98e-09	ETAC_08600	peptidase T
ETAC_RS08715	-4.62993	3.53e-06	NA	NA
ETAC_RS08740	-3.27958	5.44e-62	ETAC_08710	Universal stress protein G
ETAC_RS08750	-2.65915	1.33e-14	ETAC_08720	hypothetical protein
ETAC_RS08765	-2.80236	6.99e-06	ETAC_08735	two-component system diguanylate cyclase response regulator
ETAC_RS08775	2.00833	8.3e-31	ETAC_08750	hypothetical protein
ETAC_RS08785	-2.78108	7.97e-21	ETAC_08760	transcriptional regulator
ETAC_RS08805	-2.84357	2.79e-08	ETAC_08780	D-beta-hydroxybutyrate dehydrogenase
ETAC_RS08810	-2.82044	0.000111658	ETAC_08785	hypothetical protein
ETAC_RS08815	-6.97062	1.73e-07	ETAC_08790	Ribulose-5-phosphate 4-epimerase
ETAC_RS08820	-3.59504	4.12e-05	ETAC_08795	hypothetical protein
ETAC_RS08825	-2.46648	6.35e-09	ETAC_08800	transporter
ETAC_RS08830	-2.40739	5.53e-51	ETAC_08805	hypothetical protein
ETAC_RS08835	11.4283	7.1e-284	ETAC_08810	cystathionine beta-lyase
ETAC_RS08840	10.6331	0	ETAC_08815	cystathionine gamma-lyase
ETAC_RS08850	-2.4114	3.02e-18	ETAC_08825	hypothetical protein
ETAC_RS08855	-3.53554	4.7e-80	ETAC_08830	phosphatidylserine decarboxylase
ETAC_RS08860	-3.25669	5.68e-42	ETAC_08835	arginine:agmatine antiporter
ETAC_RS08910	-3.37931	1.89e-24	ETAC_08890	hypothetical protein
ETAC_RS08980	2.65436	2.01e-13	ETAC_08960	transcriptional regulator
ETAC_RS08990	-3.77169	2.47e-21	ETAC_08970	50S ribosomal protein L36
ETAC_RS08995	-4.33938	1.58e-23	ETAC_08975	ABC transporter permease
ETAC_RS09000	-4.52093	9.16e-20	ETAC_08980	iron ABC transporter ATP-binding protein
ETAC_RS09010	-2.8273	2.31e-05	ETAC_08990	Vibrioferrin ligase/carboxylase PvsA
ETAC_RS09015	-3.12871	1.55e-12	ETAC_08995	Vibrioferrin amide bond forming protein PvsB
ETAC_RS09020	-3.10349	9.47e-10	ETAC_09000	Vibrioferrin membrane-spanning transporterPvsC
ETAC_RS09025	-3.44033	1.62e-10	ETAC_09005	Vibrioferrin amide bond forming protein PvsD
ETAC_RS09030	-2.64871	9.04e-09	ETAC_09010	Vibrioferrin decarboxylase PvsE
ETAC_RS09040	-2.26617	1.57e-06	ETAC_09020	Vibrioferrin receptor PvuA
ETAC_RS09045	-2.15802	1.46e-05	ETAC_09025	hypothetical protein
ETAC_RS09050	-2.95825	2e-11	ETAC_09030	sugar:proton symporter
ETAC_RS09055	-2.8905	2.03e-42	ETAC_09035	ribokinase
ETAC_RS09065	2.92674	9.63e-12	ETAC_09045	hypothetical protein
ETAC_RS09070	6.12515	2.98e-64	ETAC_09055	3-isopropylmalate dehydratase small subunit
ETAC_RS09080	2.81191	1.17e-29	ETAC_09065	transcriptional regulator
ETAC_RS09120	-2.21402	2.15e-06	ETAC_09105	cobalt transporter CbiN
ETAC_RS09200	2.22109	5.32e-08	ETAC_09185	peptide transporter
ETAC_RS09280	-3.48942	1.07e-25	ETAC_09270	zinc protease
ETAC_RS09325	7.36394	5.2e-60	ETAC_09330	hypothetical protein
ETAC_RS09330	-2.12807	0.000300976	ETAC_09335	ImpA domain-containing protein
ETAC_RS09440	-6.50902	1.84e-08	NA	NA
ETAC_RS09450	-2.78444	1.11e-10	NA	NA
ETAC_RS09715	-2.85882	5.72e-113	ETAC_09740	isocitrate dehydrogenase
ETAC_RS09805	2.70662	1.25e-34	ETAC_09830	hypothetical protein
ETAC_RS09815	3.15931	1.05e-09	ETAC_09840	NADH dehydrogenase
ETAC_RS09825	3.06457	5.3e-46	ETAC_09850	DNA damage-inducible protein I
ETAC_RS09860	4.15185	6.68e-66	ETAC_09890	lipoprotein
ETAC_RS09885	-2.53159	7.71e-18	ETAC_09915	phosphatidylglycerophosphatase B
ETAC_RS09905	4.63346	3.64e-137	ETAC_09930	PTS glucose transporter subunit IIBC
ETAC_RS09940	2.46018	4.72e-27	ETAC_09965	acyl carrier protein
ETAC_RS09960	2.00661	1.26e-42	ETAC_09985	phosphate acyltransferase
ETAC_RS10015	2.50219	3.08e-20	ETAC_10040	metal resistance protein
ETAC_RS10025	-3.20251	1.26e-09	ETAC_10050	LysR family transcriptional regulator
ETAC_RS10035	-2.09902	0.00513864	ETAC_10060	3-hydroxybutyrate dehydrogenase
ETAC_RS10045	-2.04842	7.78e-05	ETAC_10070	acetate CoA-transferase subunit beta
ETAC_RS10055	2.19796	4.09e-09	ETAC_10080	aquaporin Z
ETAC_RS10060	6.71382	0	ETAC_10090	hypothetical protein
ETAC_RS10065	-2.81144	0.000598121	ETAC_10095	flagella biosynthesis protein FliZ
ETAC_RS10075	-2.55003	2.91e-05	ETAC_10105	flagellar biosynthesis protein
ETAC_RS10085	-2.62033	9.07e-09	ETAC_10115	flagellar hook-associated protein FliD
ETAC_RS10090	-2.7552	1.03e-06	ETAC_10120	flagellar export chaperone FliS
ETAC_RS10125	-2.65144	9.13e-09	ETAC_10155	flagellar MS-ring protein
ETAC_RS10130	-2.33824	2.54e-06	ETAC_10160	flagellar motor switch protein FliG
ETAC_RS10135	-2.58834	2.19e-05	ETAC_10165	flagellar assembly protein H
ETAC_RS10150	-2.55583	2.02e-07	ETAC_10180	flagellar hook-length control protein
ETAC_RS10160	-2.2067	9.89e-07	ETAC_10190	flagellar motor switch protein FliM
ETAC_RS10165	-2.54269	3.74e-07	ETAC_10195	flagellar motor switch protein FliN
ETAC_RS10195	-2.29868	5.74e-16	ETAC_10225	hypothetical protein
ETAC_RS10235	-2.28676	1.04e-16	ETAC_10265	hydroxydechloroatrazine ethylaminohydrolase
ETAC_RS10240	-2.57554	7.4e-17	ETAC_10270	purine permease
ETAC_RS10250	3.25971	4.12e-70	ETAC_10280	3-deoxy-manno-octulosonate cytidylyltransferase
ETAC_RS10305	-2.85506	6.38e-35	ETAC_10340	L-asparaginase
ETAC_RS10315	3.3532	3.37e-68	ETAC_10350	formate transporter FocA
ETAC_RS10320	2.37817	1.23e-17	ETAC_10355	keto-acid formate acetyltransferase
ETAC_RS10330	-3.51343	1.28e-51	ETAC_10365	TetR family transcriptional regulator
ETAC_RS10335	5.67272	4.26e-57	ETAC_10370	membrane protein
ETAC_RS10340	3.5908	2.17e-17	ETAC_10375	hypothetical protein
ETAC_RS10345	4.35016	2.7e-67	ETAC_10380	cytochrome c-type biogenesis protein CcdA
ETAC_RS10350	4.51483	2.12e-77	ETAC_10385	membrane protein
ETAC_RS10355	-2.46455	8.01e-17	ETAC_10390	hypothetical protein
ETAC_RS10360	-2.68175	7.42e-15	ETAC_10395	MFS family transporter protein
ETAC_RS10420	2.01026	2.9e-29	ETAC_10455	cysteine/glutathione ABC transporter membrane/ATP-binding protein
ETAC_RS10475	9.49569	2.63e-149	ETAC_10510	hydroxylamine reductase
ETAC_RS10480	8.84359	3.34e-95	ETAC_10515	oxidoreductase
ETAC_RS10485	3.42988	0.000361419	ETAC_10520	hypothetical protein
ETAC_RS10550	-3.1073	1.03e-52	ETAC_10585	arginine ABC transporter ATP-binding protein
ETAC_RS10555	-3.18623	1.38e-35	ETAC_10590	arginine ABC transporter substrate-binding protein
ETAC_RS10560	-2.40767	1.05e-11	ETAC_10595	arginine transporter permease subunit ArtQ
ETAC_RS10570	-3.24841	2.78e-24	ETAC_10605	arginine ABC transporter substrate-binding protein
ETAC_RS10650	3.35693	3.47e-32	ETAC_10705	serine/threonine protein kinase
ETAC_RS10655	2.06893	1.44e-22	ETAC_10710	L-serine dehydratase
ETAC_RS10660	-2.59892	2.23e-35	ETAC_10715	D-alanyl-D-alanine carboxypeptidase
ETAC_RS10755	-6.58107	4.98e-62	ETAC_10810	tryptophan permease
ETAC_RS10760	2.41472	1.02e-31	ETAC_10815	elongation factor Ts
ETAC_RS10790	-4.15177	2.43e-29	ETAC_10845	hypothetical protein
ETAC_RS10805	-3.16686	1.7e-35	ETAC_10860	amino acid permease
ETAC_RS10820	3.64603	1.52e-33	ETAC_10875	PTS fructose transporter subunit IIA
ETAC_RS10830	-4.10128	5.31e-36	ETAC_10885	glutamine ABC transporter substrate-binding protein
ETAC_RS10835	-3.08608	7.29e-32	ETAC_10890	glutamine ABC transporter permease
ETAC_RS10855	-2.84124	1.28e-18	ETAC_10910	hypothetical protein
ETAC_RS10880	2.98531	1.11e-10	ETAC_10935	50S ribosomal protein L25
ETAC_RS10935	2.76202	6.95e-24	ETAC_10985	RNA helicase
ETAC_RS10990	2.0569	9.59e-18	ETAC_11040	ribonucleotide-diphosphate reductase subunit alpha
ETAC_RS10995	2.01439	8.1e-17	ETAC_11045	ribonucleotide-diphosphate reductase subunit beta
ETAC_RS11000	2.20242	9.96e-17	ETAC_11050	Ferredoxin
ETAC_RS11095	2.48565	2.44e-15	ETAC_11145	membrane protein
ETAC_RS11125	-2.59809	1.32e-05	ETAC_11175	hydrogenase
ETAC_RS11130	-2.95135	4.9e-11	ETAC_11180	hydrogenase 2 small subunit
ETAC_RS11140	-2.4846	4.74e-13	ETAC_11190	LPS glycosyltransferase
ETAC_RS11170	-2.15969	3.68e-07	ETAC_11225	NADH-quinone oxidoreductase subunit K
ETAC_RS11175	-2.20413	7.63e-14	ETAC_11230	NADH:ubiquinone oxidoreductase subunit J
ETAC_RS11280	3.48315	1.5e-41	ETAC_11335	acetate kinase A/propionate kinase 2
ETAC_RS11285	4.15161	3.34e-33	ETAC_11340	phosphate acetyltransferase
ETAC_RS11305	-3.51483	8.89e-32	ETAC_11360	sulfurtransferase
ETAC_RS11340	2.52479	7.95e-18	ETAC_11395	3-ketoacyl-ACP reductase
ETAC_RS11380	2.175	6.41e-40	ETAC_11435	tRNA pseudouridine synthase A
ETAC_RS11440	4.32539	1.85e-06	NA	type VI secretion protein
ETAC_RS11445	4.54056	1.32e-35	ETAC_11500	type VI secretion protein
ETAC_RS11450	3.69376	3.48e-32	ETAC_11505	type VI secretion protein EvpB
ETAC_RS11455	2.25347	3.79e-07	ETAC_11510	type VI secretion protein
ETAC_RS11460	3.18055	2.13e-23	ETAC_11515	type VI secretion system protein EvpD
ETAC_RS11465	4.46635	3.51e-56	ETAC_11520	type VI secretion protein
ETAC_RS11470	3.69078	2.03e-56	ETAC_11525	type VI secretion system protein EvpF
ETAC_RS11475	3.49464	1.25e-61	ETAC_11530	type VI secretion system protein EvpG
ETAC_RS11480	2.96599	4.77e-37	ETAC_11535	type VI secretion system protein EvpH
ETAC_RS11485	3.734	2.04e-89	ETAC_11540	type VI secretion protein
ETAC_RS11495	2.03081	2.16e-08	ETAC_11550	type VI secretion system protein EvpK
ETAC_RS11500	3.61328	1.82e-96	ETAC_11555	type VI secretion protein
ETAC_RS11505	3.54485	8.93e-82	ETAC_11560	type VI secretion protein
ETAC_RS11510	3.87206	1.48e-56	ETAC_11565	type VI secretion system protein EvpN
ETAC_RS11515	3.48091	3.07e-127	ETAC_11570	type VI secretion system protein EvpO
ETAC_RS11605	-2.84392	1.95e-05	ETAC_11660	hypothetical protein
ETAC_RS11635	-2.36603	3.18e-05	ETAC_11690	phage-related protein, tail component
ETAC_RS11640	-2.84174	7.58e-05	ETAC_11695	phage tail assembly protein
ETAC_RS11650	-2.07695	0.000177074	ETAC_11705	phage tail component L-like protein
ETAC_RS11985	-2.66346	5.09e-07	ETAC_12060	Rhodanese-related sulfurtransferase
ETAC_RS12000	2.07766	1.15e-12	ETAC_12075	hypothetical protein
ETAC_RS12005	-7.5598	7.51e-199	ETAC_12080	carbon starvation protein A
ETAC_RS12010	-6.63655	7.26e-30	ETAC_12085	hypothetical protein
ETAC_RS12015	-6.82172	4.32e-43	ETAC_12090	hypothetical protein
ETAC_RS12020	-5.24244	1.23e-39	ETAC_12095	hypothetical protein
ETAC_RS12025	-2.28655	1.51e-95	ETAC_12100	hypothetical protein
ETAC_RS12035	-4.52045	1.69e-50	ETAC_12110	AraC family transcriptional regulator
ETAC_RS12065	-4.21834	9.29e-11	ETAC_12140	hypothetical protein
ETAC_RS12070	-6.48353	6.51e-15	ETAC_12145	thiamine biogenesis protein ThiJ
ETAC_RS12075	-5.29792	8.98e-21	ETAC_12150	fructose-bisphosphate aldolase
ETAC_RS12080	-2.12197	1.63e-07	ETAC_12155	hypothetical protein
ETAC_RS12085	-2.41358	6.22e-08	ETAC_12160	sulfatase
ETAC_RS12090	-2.74685	1.94e-06	ETAC_12165	anaerobic sulfatase maturase
ETAC_RS12095	-2.10388	6.3e-12	ETAC_12170	glycosyl hydrolase family 88
ETAC_RS12100	-3.10601	8.48e-11	ETAC_12175	N-acetylglucosamine-6-phosphate deacetylase
ETAC_RS12105	-3.39423	1.92e-11	ETAC_12180	PTS fructose IIA component domain protein
ETAC_RS12110	-4.07649	2.98e-38	ETAC_12185	PTS N-acetylgalactosamine transporter subunit IID
ETAC_RS12115	-4.15682	1.63e-27	ETAC_12190	PTS acetylgalactosamine transporter subunit IIC
ETAC_RS12120	-4.32204	5.25e-17	ETAC_12195	PTS N-acetylgalactosamine transporter subunit IIB
ETAC_RS12125	-2.4338	2.56e-06	ETAC_12200	aldose isomerase
ETAC_RS12130	-2.4899	3.03e-07	ETAC_12205	tagatose-bisphosphate aldolase
ETAC_RS12155	3.12397	8.59e-49	ETAC_12230	arsenical-resistance protein ACR3
ETAC_RS12170	2.20345	3.86e-85	ETAC_12245	excinuclease ABC subunit B
ETAC_RS12175	-3.08914	4.47e-06	ETAC_12250	dithiobiotin synthetase
ETAC_RS12180	-2.30004	0.00573451	ETAC_12255	malonyl-[acyl-carrier protein] O-methyltransferase BioC
ETAC_RS12205	-3.53641	3.64e-55	ETAC_12280	molybdate transporter ATP-binding protein
ETAC_RS12215	-4.55202	5.95e-110	ETAC_12290	molybdate transporter periplasmic protein
ETAC_RS12235	-2.70232	8.15e-21	ETAC_12310	metal-dependent membrane protease
ETAC_RS12260	-6.46549	1.71e-115	ETAC_12335	hypothetical protein
ETAC_RS12275	3.15753	4.57e-07	NA	NA
ETAC_RS12285	2.30127	0.00999377	NA	NA
ETAC_RS12305	2.13398	3.5e-20	ETAC_12350	tol-pal system protein YbgF
ETAC_RS12355	-4.87372	5.99e-283	ETAC_12405	succinyl-CoA synthetase subunit alpha
ETAC_RS12360	-4.54458	1.53e-194	ETAC_12410	malate--CoA ligase subunit beta
ETAC_RS12365	-4.15202	5.93e-185	ETAC_12415	dihydrolipoamide succinyltransferase
ETAC_RS12370	-4.27482	0	ETAC_12420	2-oxoglutarate dehydrogenase E1 component
ETAC_RS12380	-5.66439	0	ETAC_12430	succinate dehydrogenase flavoprotein subunit
ETAC_RS12385	-6.73667	1.7e-53	ETAC_12435	succinate dehydrogenase cytochrome b556 small membrane subunit
ETAC_RS12390	-6.98573	6.2e-79	ETAC_12440	succinate dehydrogenase cytochrome b556 large membrane subunit
ETAC_RS12395	-3.78138	2.5e-89	ETAC_12445	type II citrate synthase
ETAC_RS12515	-3.65272	0.00929688	ETAC_12560	hypothetical protein
ETAC_RS12530	-2.22104	2.93e-59	ETAC_12575	PTS N-acetyl glucosamine transporter subunit IIABC
ETAC_RS12610	-2.6077	5.52e-13	ETAC_12620	aminobenzoyl-glutamate transporter
ETAC_RS12635	-6.05747	1.44e-46	ETAC_12645	glutamate ABC transporter substrate-binding protein
ETAC_RS12640	-5.56784	2.46e-26	ETAC_12650	glutamate/aspartate ABC transporter permease GltJ
ETAC_RS12645	-4.46254	2.49e-18	ETAC_12655	glutamate/aspartate transporter permease GltK
ETAC_RS12660	-2.27881	5.21e-45	ETAC_12670	hypothetical protein
ETAC_RS12745	-2.11556	1.9e-40	ETAC_12755	nickel transporter
ETAC_RS12755	-3.19499	1.17e-12	ETAC_12770	formamidopyrimidine-DNA glycosylase
ETAC_RS12760	-2.10583	1.2e-23	ETAC_12775	crotonobetaine/carnitine-CoA ligase
ETAC_RS12820	2.58374	4.48e-15	ETAC_12835	transcriptional regulator
ETAC_RS12825	-2.88621	1.07e-29	ETAC_12840	methyltransferase
ETAC_RS12830	-2.82323	9.8e-53	ETAC_12845	molybdenum transporter ModD
ETAC_RS12845	-2.53374	4.87e-05	ETAC_12860	transcriptional regulator
ETAC_RS12850	-2.57604	1.94e-16	ETAC_12865	hypothetical protein
ETAC_RS12890	-4.66428	5.69e-18	ETAC_12905	protein hdeB
ETAC_RS12895	-2.66157	4.14e-22	ETAC_12910	chloride channel protein
ETAC_RS13035	-2.27992	5.7e-06	ETAC_13050	diguanylate cyclase
ETAC_RS13040	-3.57297	7.57e-10	ETAC_13055	N5-carboxyaminoimidazole ribonucleotide mutase
ETAC_RS13045	-2.71349	1.31e-05	ETAC_13060	phosphoribosylaminoimidazole carboxylase ATPase subunit
ETAC_RS13050	-2.53334	4.89e-35	ETAC_13065	ABC transporter permease YbbP
ETAC_RS13075	-2.34864	3.81e-38	ETAC_13090	membrane protein
ETAC_RS13090	-3.44353	3.42e-18	ETAC_13105	hypothetical protein
ETAC_RS13105	2.68375	9.02e-18	ETAC_13120	nucleoside triphosphate hydrolase
ETAC_RS13170	-2.26513	1.8e-25	ETAC_13185	anti-RNA polymerase sigma factor SigE
ETAC_RS13215	3.17125	7.68e-16	ETAC_13230	DNA repair protein RecN
ETAC_RS13270	2.18083	3.18e-12	ETAC_13280	hypothetical protein
ETAC_RS13280	5.66913	5.37e-170	ETAC_13290	ribonuclease
ETAC_RS13325	-4.23933	1.18e-35	ETAC_13335	iron ABC transporter substrate-binding protein
ETAC_RS13330	-3.15632	2.32e-35	ETAC_13340	iron ABC transporter permease
ETAC_RS13335	-3.37745	5.11e-09	ETAC_13345	Ferric iron ABC transporter ATP-binding protein
ETAC_RS13340	-3.32011	7.76e-58	ETAC_13350	serine endoprotease
ETAC_RS13355	2.23115	6.88e-28	ETAC_13365	Vitamin B12 ABC transporter B12-binding protein BtuF
ETAC_RS13585	5.9043	2.43e-160	ETAC_13595	flavohemoprotein
ETAC_RS13610	2.40752	5.17e-78	ETAC_13615	hydroxyacylglutathione hydrolase
ETAC_RS13675	-2.08941	5.12e-16	ETAC_13650	cold-shock protein
ETAC_RS13695	-2.25935	2.88e-52	ETAC_13670	two-component system response regulator
ETAC_RS13805	-3.21826	3.41e-05	NA	NA
ETAC_RS13820	3.50329	1.1e-34	ETAC_13770	recombination protein RecX
ETAC_RS13825	3.373	2.67e-214	ETAC_13775	recombinase RecA
ETAC_RS13840	-2.91463	1.07e-06	ETAC_13790	transporter
ETAC_RS13845	-2.69732	2.06e-09	ETAC_13795	transporter
ETAC_RS13850	-2.94735	3.64e-07	ETAC_13800	glutaminase
ETAC_RS13865	-2.64233	3.73e-10	ETAC_13815	methyl-accepting chemotaxis sensory transducer
ETAC_RS13885	-2.4744	2.54e-22	ETAC_13835	RNA polymerase sigma factor RpoS
ETAC_RS14000	-2.19781	0.00924479	ETAC_13950	formate hydrogenlyase subunit 7
ETAC_RS14080	-6.30408	1.09e-31	ETAC_14035	exported sulfatase
ETAC_RS14090	-3.52168	1.16e-06	ETAC_14045	hypothetical protein
ETAC_RS14095	-3.86595	4.34e-06	ETAC_14050	hypothetical protein
ETAC_RS14100	-3.94015	1.07e-05	ETAC_14055	hypothetical protein
ETAC_RS14105	3.34815	2.88e-43	ETAC_14060	Lipid A biosynthesis lauroyl acyltransferase
ETAC_RS14125	-2.38432	1.9e-12	ETAC_14075	outer membrane protein
ETAC_RS14195	-2.54383	1.3e-19	ETAC_14145	alanine glycine permease
ETAC_RS14200	-5.09118	8.84e-87	ETAC_14150	glycine dehydrogenase
ETAC_RS14205	-5.96328	2.55e-37	ETAC_14155	glycine cleavage system protein H
ETAC_RS14210	-4.86893	8.32e-61	ETAC_14160	glycine cleavage system protein T
ETAC_RS14240	-2.71816	3.02e-15	ETAC_14190	5-formyltetrahydrofolate cyclo-ligase
ETAC_RS14295	-3.64015	2.2e-16	ETAC_14250	hypothetical protein
ETAC_RS14305	3.13209	1.41e-99	ETAC_14260	arginine decarboxylase
ETAC_RS14310	3.16151	2.09e-12	ETAC_14265	S-adenosylmethionine synthetase
ETAC_RS14325	-2.57537	1.98e-16	ETAC_14280	DNA-binding protein
ETAC_RS14345	-2.78388	0.00114596	ETAC_14305	glycoside hydrolase
ETAC_RS14360	-2.71941	1.91e-15	ETAC_14320	C4-dicarboxylate ABC transporter substrate-binding protein
ETAC_RS14370	-2.11646	1.85e-05	ETAC_14330	adenosine deaminase
ETAC_RS14375	-3.04927	4.86e-07	ETAC_14335	C4-dicarboxylate ABC transporter
ETAC_RS14450	-6.51196	4.22e-15	ETAC_14415	rubredoxin
ETAC_RS14455	-6.70582	5.93e-94	ETAC_14420	hydrogenase-1 operon protein HyaF
ETAC_RS14460	-7.19487	2.16e-44	ETAC_14425	hydrogenase-1 operon protein HyaE
ETAC_RS14465	-7.30977	1.21e-122	ETAC_14430	hydrogenase 1 maturation protease
ETAC_RS14470	-6.54971	3.41e-136	ETAC_14435	hydrogenase 1 b-type cytochrome subunit
ETAC_RS14475	-6.21952	9.06e-262	ETAC_14440	hydrogenase 2 large subunit
ETAC_RS14480	-5.75617	1.3e-122	ETAC_14445	hydrogenase
ETAC_RS14485	-3.45323	4.93e-05	ETAC_14465	putrescine transporter
ETAC_RS14510	4.05271	3.87e-27	ETAC_14490	membrane protein
ETAC_RS14690	-2.5221	7.29e-08	ETAC_14670	N-acetylmuramoyl-L-alanine amidase
ETAC_RS14700	4.76534	6.07e-21	ETAC_14680	membrane protein
ETAC_RS14840	-2.10391	2.95e-06	ETAC_14810	amino acid transporter
ETAC_RS14845	-2.62934	1.78e-06	ETAC_14815	diaminopimelate decarboxylase
ETAC_RS14860	-3.92183	3.15e-29	ETAC_14830	ornithine carbamoyltransferase
ETAC_RS14865	-2.38825	1.75e-12	ETAC_14835	hypothetical protein
ETAC_RS14885	2.32225	3.1e-06	ETAC_14855	sn-glycerol-3-phosphate transporter
ETAC_RS14900	-2.14215	6.1e-28	ETAC_14870	glutathione S-transferase
ETAC_RS15075	3.72111	4.29e-44	ETAC_15045	hypothetical protein
ETAC_RS15100	-3.46043	2.29e-30	ETAC_15070	permease
ETAC_RS15105	-3.88408	1.17e-08	ETAC_15075	guanine deaminase
ETAC_RS15110	-4.21732	4.22e-13	ETAC_15080	purine permease YgfO
ETAC_RS15115	-4.62482	1.29e-13	ETAC_15085	hypoxanthine oxidase
ETAC_RS15120	-5.09065	1.04e-18	ETAC_15090	oxidoreductase
ETAC_RS15125	-7.24728	1.22e-19	ETAC_15095	chlorohydrolase/aminohydrolase
ETAC_RS15130	-7.61515	6.68e-18	ETAC_15100	selenate reductase subunit YgfK
ETAC_RS15140	-5.30796	1.11e-14	ETAC_15110	hypothetical protein
ETAC_RS15145	-6.03632	1.33e-08	ETAC_15115	hypothetical protein
ETAC_RS15150	-5.2363	5.02e-25	ETAC_15120	carbamate kinase
ETAC_RS15155	-4.75614	7.14e-14	ETAC_15125	phenylhydantoinase
ETAC_RS15160	-5.18922	7.42e-17	ETAC_15130	peptidase
ETAC_RS15165	-7.98819	1.03e-36	ETAC_15135	diaminopropionate ammonia-lyase
ETAC_RS15170	-9.16011	2.69e-24	ETAC_15140	ornithine carbamoyltransferase
ETAC_RS15175	-5.4851	4.94e-112	ETAC_15145	transcriptional regulator
ETAC_RS15245	4.04762	0.0049516	NA	NA
ETAC_RS15350	2.80656	3.71e-62	ETAC_15280	DNA-directed RNA polymerase subunit alpha
ETAC_RS15355	3.33375	2.24e-37	ETAC_15285	30S ribosomal protein S4
ETAC_RS15360	2.48633	2.83e-18	ETAC_15290	30S ribosomal protein S11
ETAC_RS15435	2.1279	6.07e-36	ETAC_15370	50S ribosomal protein L16
ETAC_RS15440	2.45477	5.75e-52	ETAC_15375	30S ribosomal protein S3
ETAC_RS15445	2.08413	3.71e-20	ETAC_15380	50S ribosomal protein L22
ETAC_RS15515	2.61682	9.27e-23	ETAC_15450	hypothetical protein
ETAC_RS15530	2.1749	1.26e-80	ETAC_15465	peptidyl-prolyl cis-trans isomerase
ETAC_RS15570	3.9114	9.6e-24	ETAC_15505	transporter
ETAC_RS15590	2.2671	3.82e-48	ETAC_15525	tryptophanyl-tRNA synthetase
ETAC_RS15685	-3.72159	1.28e-05	ETAC_15620	thiosulfate reductase cytochrome B subunit
ETAC_RS15700	-3.07357	3.66e-81	ETAC_15635	phosphoenolpyruvate carboxykinase
ETAC_RS15725	-2.78386	1.14e-23	ETAC_15660	iron transporter FeoA
ETAC_RS15730	-2.28014	1.22e-18	ETAC_15665	ferrous iron transporter B
ETAC_RS15735	-4.04793	1.91e-25	ETAC_15670	hypothetical protein
ETAC_RS15765	-3.49389	2.15e-14	ETAC_15700	PTS ascorbate transporter subunit IIC
ETAC_RS15775	-2.51386	7.31e-07	ETAC_15710	PTS ascorbate transporter subunit IIA
ETAC_RS15785	-2.38696	1.16e-05	ETAC_15720	L-xylulose 5-phosphate 3-epimerase
ETAC_RS15835	-2.99664	6.58e-37	ETAC_15770	glucose-1-phosphate adenylyltransferase
ETAC_RS15840	-2.58585	4.83e-52	ETAC_15775	glycogen branching enzyme
ETAC_RS15845	-2.1514	1.63e-11	ETAC_15780	glycogen debranching protein
ETAC_RS15850	-3.83425	9.52e-84	ETAC_15785	glucose-1-phosphate adenylyltransferase
ETAC_RS15855	-2.94841	9.18e-33	ETAC_15790	glycogen synthase
ETAC_RS15885	-2.01612	1.11e-09	ETAC_15820	hypothetical protein
ETAC_RS15905	-2.83015	0.00152154	ETAC_15840	glycerol-3-phosphate transporter permease
ETAC_RS15910	-2.11448	0.000199558	ETAC_15845	glycerol-3-phosphate transporter periplasmic-binding protein
ETAC_RS15925	-2.56777	1.96e-15	ETAC_15860	gluconate:proton symporter
ETAC_RS15985	-2.97644	3.23e-58	ETAC_15925	formate dehydrogenase accessory protein
ETAC_RS15990	-3.44988	5.55e-58	ETAC_15930	formate dehydrogenase subunit alpha
ETAC_RS16030	-2.26681	5.36e-44	ETAC_15970	sensor histidine kinase
ETAC_RS16035	3.4072	1.2e-32	ETAC_15975	magnesium-translocating P-type ATPase
ETAC_RS16055	-2.64157	1.39e-29	ETAC_15995	universal stress protein A
ETAC_RS16070	2.81504	2.95e-61	ETAC_16010	two-component system sensor histidine kinase
ETAC_RS16075	2.35319	4.3e-25	ETAC_16015	two-component system response regulator
ETAC_RS16080	-4.13026	1.07e-75	ETAC_16020	LacI family transcriptional regulator
ETAC_RS16085	-3.12858	2.16e-22	ETAC_16025	sugar ABC transporter ATP-binding protein
ETAC_RS16090	-4.0285	9.67e-25	ETAC_16030	sugar ABC transporter permease
ETAC_RS16095	-2.98492	1.21e-43	ETAC_16035	sugar ABC transporter permease
ETAC_RS16105	-2.14327	2.79e-05	ETAC_16045	phosphosugar isomerase/binding protein
ETAC_RS16140	2.73018	2.76e-36	ETAC_16080	hypothetical protein
ETAC_RS16150	-2.66044	1.88e-17	ETAC_16090	hypothetical protein
ETAC_RS16165	-4.4194	5.66e-21	ETAC_16105	cyclic di-GMP phosphodiesterase
ETAC_RS16170	-2.36847	1.94e-09	ETAC_16110	ketodeoxygluconokinase
ETAC_RS16180	-4.94311	1.21e-62	ETAC_16120	C4-dicarboxylate ABC transporter
ETAC_RS16235	-2.49213	2.36e-10	ETAC_16180	dipeptide transporter
ETAC_RS16300	-3.09293	8.96e-23	ETAC_16235	universal stress protein
ETAC_RS16315	-3.61747	0.000250348	NA	hypothetical protein
ETAC_RS16405	-2.41918	2.54e-32	ETAC_16340	multidrug resistance protein D
ETAC_RS16435	2.26058	5.57e-114	ETAC_16370	6-phosphofructokinase
ETAC_RS16635	-3.1571	3.23e-26	ETAC_16585	universal stress protein
ETAC_RS16675	2.43745	3.23e-08	ETAC_16625	Rhodanese-like domain-containing protein
ETAC_RS16680	2.56539	1.33e-65	ETAC_16630	phosphoglyceromutase
ETAC_RS16785	-2.72831	4.63e-17	ETAC_16700	soluble pyridine nucleotide transhydrogenase
ETAC_RS16810	-2.97597	5.09e-15	ETAC_16725	argininosuccinate synthase
ETAC_RS16815	-2.83513	1.02e-14	ETAC_16730	acetylglutamate kinase
ETAC_RS16830	3.80554	1.79e-124	ETAC_16745	phosphoenolpyruvate carboxylase
ETAC_RS16835	-2.82858	0.000391403	ETAC_16750	5,10-methylenetetrahydrofolate reductase
ETAC_RS16870	2.34354	8.15e-58	ETAC_16785	GTP-binding protein
ETAC_RS17015	-2.34665	1.92e-05	ETAC_16900	D-ribose pyranase
ETAC_RS17035	-5.41395	1.26e-75	ETAC_16920	asparagine synthetase AsnA
ETAC_RS17040	3.08079	3.87e-07	ETAC_16925	transcriptional regulator
ETAC_RS17135	2.49285	1.53e-23	ETAC_17020	phosphate import ATP-binding protein PstB
ETAC_RS17160	-2.69329	7.3e-22	ETAC_17045	hypothetical protein
ETAC_RS17165	-2.22182	5.65e-21	ETAC_17050	hypothetical protein
ETAC_RS17185	2.76792	8.3e-25	ETAC_17070	membrane protein insertase
ETAC_RS17445	2.94	7.2e-15	NA	NA
ETAC_RS17470	-5.62156	4.6e-61	NA	NA
ETAC_RS17515	2.82599	0.00371765	NA	NA
ETAC_RS17545	-2.35642	5.15e-06	NA	NA
ETAC_RS17585	-3.54881	0.00278436	NA	NA
ETAC_RS17605	2.53515	0.000715449	NA	NA
ETAC_RS17630	-2.43369	2.78e-10	NA	NA
ETAC_RS17635	-3.81484	1.83e-19	NA	NA
ETAC_RS17715	3.54482	1.55e-27	NA	NA
ETAC_RS17720	4.85833	3.01e-62	NA	NA
ETAC_RS17775	-3.21091	0.00745177	NA	NA
ETAC_RS17855	-2.76863	1.61e-08	NA	NA
ETAC_RS17915	3.91766	6.29e-15	NA	NA
ETAC_RS17920	3.49842	7.24e-29	NA	NA
ETAC_RS17925	-3.04686	0.00943208	NA	NA
ETAC_RS18075	2.23404	5.15e-26	NA	NA
fabG	2.69381	2.76e-39	NA	NA
fbpC	-6.78492	3.56e-58	NA	NA
flgD	-2.68325	1.6e-07	NA	NA
flgE	-2.61595	6.42e-10	NA	NA
flgF	-2.1811	6.32e-07	NA	NA
flgI	-2.23581	7.71e-08	NA	NA
flgL	-4.20013	1.69e-15	NA	NA
fliA	-4.33423	1.51e-27	NA	NA
fliJ	-2.04083	0.000389999	NA	NA
fliL	-2.01911	5.34e-05	NA	NA
fxsA	-3.44593	1.57e-12	NA	NA
glnQ	-2.93256	2.59e-11	NA	NA
gpmA	-2.4405	4.39e-28	NA	NA
modB	-4.1224	4.06e-115	NA	NA
napB	4.76405	1.45e-52	NA	NA
oppB	-3.14851	2.93e-36	NA	NA
oppD	-2.44185	1.79e-13	NA	NA
putA	-6.2162	3.07e-195	NA	NA
rnpB	-2.60522	5.79e-25	NA	NA
rrf	-3.82901	8.08e-13	NA	NA
sdhB	-5.52527	0	NA	NA
ssrA	-2.55996	6.53e-17	NA	NA
ssrS	-6.42746	6.81e-30	NA	NA
ulaD	-2.94082	1.19e-09	NA	NA
