# Supplementary material for: In vitro Edwardsiella piscicida CK108 Transcriptome Profiles with Subinhibitory Concentrations of Phenol and Formalin Reveal New Insights into Bacterial Pathogenesis Mechanisms
Source: Microorganisms. 2020 Jul 17;8(7):1068. doi: 10.3390/microorganisms8071068 (PMC7409036; doi:10.3390/microorganisms8071068)
Supplement: Supplementary file 1 [file microorganisms-08-01068-s001.zip › Suppl_Table S3_Primers.xlsx]

## Sheet: Sheet1
Table 3. Primers used for qRT-PCR.
Primer	Sequence (5’-3’)	Description	Amplicon size (bp)
KH147	CCG TGT TAC CGC TGA AAG AG	Forward for GAPDH	99
KH148	GTT TCG TCG GTC AGG AAC AG	Reverse for GAPDH
KH171	CCG TCT CCA GCT ATC AAT GC	Forward for Hcp	158
KH172	AAT AAG GCT CCA GCC CTC AG	Reverse for Hcp
KH177	TCT GCG TAA ACA GGT GGA GA	Forward for Translocon	97
KH178	GGC GAT AGA GAC GAT CCA GT	Reverse for Translocon
KH182	GCT GGC AAC CCT GGA TAA AG	Forward for FliC	146
KH183	CGT CCT GAA TAC GTG AAC GG	Reverse for FliC
KH186	GGC ACG TAC TGT GTA CCG AT	Forward for HisA	112
KH187	CCG GAG GAT TGA AAT GCG AT	Reverse for HisA
KH192	CCG CCA AGA TCG AGG AGA TA	Forward for BaeR	115
KH193	CGC AGA ATC GTC TTC ACT CG	Reverse for BaeR
